# Supplementary material for: Cost of hospitalised patients due to complicated urinary tract infections: a retrospective observational study in countries with high prevalence of multidrug-resistant Gram-negative bacteria: the COMBACTE-MAGNET, RESCUING study
Source: PubMed Central journal article supplement — BMJ Open. 2018 Apr 12;8(4):e020251. doi: 10.1136/bmjopen-2017-020251 (PMC5898316; doi:10.1136/bmjopen-2017-020251), 2018-04-12
Supplement: bmjopen-2017-020251.draft_revisions.pdf [file bmjopen-2017-020251.draft_revisions.pdf]

# BMJ Open

BMJ Open is committed to open peer review. As part of this commitment we make the peer review history of every article we publish publicly available.

When an article is published we post the peer reviewers' comments and the authors' responses online. We also post the versions of the paper that were used during peer review. These are the versions that the peer review comments apply to.

The versions of the paper that follow are the versions that were submitted during the peer review process. They are not the versions of record or the final published versions. They should not be cited or distributed as the published version of this manuscript.

BMJ Open is an open access journal and the full, final, typeset and author-corrected version of record of the manuscript is available on our site with no access controls, subscription charges or pay-per-view fees (<http://bmjopen.bmj.com>).

If you have any questions on BMJ Open's open peer review process please email [info.bmjopen@bmj.com](mailto:info.bmjopen@bmj.com)

# BMJ Open

## The cost of hospitalised patients due to complicated urinary tract infections – A retrospective observational study in countries with high prevalence of multidrug resistant Gram-negative bacteria: the COMBACTE-MAGNET, RESCUING study

|                                 |                                                                                                                                                                                                                                                                                                                                                                                                                                                                                                                                                                                                                                                                                                                                                                                                                                                                                                                                                                                                                                                                                                                                                                                                                                                                                                                                                                                                                                                                                                                                                                             |
|---------------------------------|-----------------------------------------------------------------------------------------------------------------------------------------------------------------------------------------------------------------------------------------------------------------------------------------------------------------------------------------------------------------------------------------------------------------------------------------------------------------------------------------------------------------------------------------------------------------------------------------------------------------------------------------------------------------------------------------------------------------------------------------------------------------------------------------------------------------------------------------------------------------------------------------------------------------------------------------------------------------------------------------------------------------------------------------------------------------------------------------------------------------------------------------------------------------------------------------------------------------------------------------------------------------------------------------------------------------------------------------------------------------------------------------------------------------------------------------------------------------------------------------------------------------------------------------------------------------------------|
| Journal:                        | <i>BMJ Open</i>                                                                                                                                                                                                                                                                                                                                                                                                                                                                                                                                                                                                                                                                                                                                                                                                                                                                                                                                                                                                                                                                                                                                                                                                                                                                                                                                                                                                                                                                                                                                                             |
| Manuscript ID                   | bmjopen-2017-020251                                                                                                                                                                                                                                                                                                                                                                                                                                                                                                                                                                                                                                                                                                                                                                                                                                                                                                                                                                                                                                                                                                                                                                                                                                                                                                                                                                                                                                                                                                                                                         |
| Article Type:                   | Research                                                                                                                                                                                                                                                                                                                                                                                                                                                                                                                                                                                                                                                                                                                                                                                                                                                                                                                                                                                                                                                                                                                                                                                                                                                                                                                                                                                                                                                                                                                                                                    |
| Date Submitted by the Author:   | 25-Oct-2017                                                                                                                                                                                                                                                                                                                                                                                                                                                                                                                                                                                                                                                                                                                                                                                                                                                                                                                                                                                                                                                                                                                                                                                                                                                                                                                                                                                                                                                                                                                                                                 |
| Complete List of Authors:       | <p>Vallejo Torres, Laura; University College London, Department of Applied Health Research; Universidad de Las Palmas de Gran Canaria, Departamento de Métodos Cuantitativos en Economía y Gestión Pujol, Miquel; Hospital Universitari de Bellvitge. IDIBELL, Infectious Diseases; Spanish Network for the Research in Infectious Diseases (REIPI RD12/0015), Instituto de Salud Carlos III</p> <p>Shaw, Evelyn; Hospital Universitari de Bellvitge. IDIBELL, Infectious Diseases; Spanish Network for the Research in Infectious Diseases (REIPI RD12/0015), Instituto de Salud Carlos III</p> <p>Wiegand, Irith; AiCuris Anti-infective Cures GmbH, Vigo, Joan Miquel; Fundació Institut Català de Farmacologia, Informatics Unit</p> <p>Stoddart, Margaret; Southmead Hospital</p> <p>Grier, Sally; Southmead Hospital</p> <p>Gibbs, Julie; Southmead Hospital</p> <p>Vank, Christiane; AiCuris Anti-infective Cures GmbH</p> <p>Cuperus, Nienke ; University Medical Center Utrecht</p> <p>van den Heuvel, Leo; University Medical Center Utrecht</p> <p>Eliakim-Raz, Noa; Rabin Medical Center</p> <p>Carratala, Jordi; Hospital Universitari de Bellvitge, Infectious Diseases</p> <p>Vuong, Cuong; AiCuris Anti-infective Cures GmbH</p> <p>MacGowan, Alasdair; Southmead Hospital</p> <p>Babich, Tanya; Rabin Medical Center, Beilinson Hospital</p> <p>Leibovici, Leonard; Tel Aviv University, Medicine E</p> <p>Addy, Ibironke; AiCuris Anti-infective Cures GmbH,</p> <p>Morris, Stephen; University College London, Department of Applied Health Research</p> |
| <b>Primary Subject Heading</b>: | Urology                                                                                                                                                                                                                                                                                                                                                                                                                                                                                                                                                                                                                                                                                                                                                                                                                                                                                                                                                                                                                                                                                                                                                                                                                                                                                                                                                                                                                                                                                                                                                                     |
| Secondary Subject Heading:      | Health economics                                                                                                                                                                                                                                                                                                                                                                                                                                                                                                                                                                                                                                                                                                                                                                                                                                                                                                                                                                                                                                                                                                                                                                                                                                                                                                                                                                                                                                                                                                                                                            |
| Keywords:                       | Urinary tract infections < UROLOGY, cost of illness, Health economics < HEALTH SERVICES ADMINISTRATION & MANAGEMENT                                                                                                                                                                                                                                                                                                                                                                                                                                                                                                                                                                                                                                                                                                                                                                                                                                                                                                                                                                                                                                                                                                                                                                                                                                                                                                                                                                                                                                                         |
|                                 |                                                                                                                                                                                                                                                                                                                                                                                                                                                                                                                                                                                                                                                                                                                                                                                                                                                                                                                                                                                                                                                                                                                                                                                                                                                                                                                                                                                                                                                                                                                                                                             |

1  
2  
3  
4  
5  
6  
7  
8  
9  
10  
11  
12  
13  
14  
15  
16  
17  
18  
19  
20  
21  
22  
23  
24  
25  
26  
27  
28  
29  
30  
31  
32  
33  
34  
35  
36  
37  
38  
39  
40  
41  
42  
43  
44  
45  
46  
47  
48  
49  
50  
51  
52  
53  
54  
55  
56  
57  
58  
59  
60

SCHOLARONE™  
Manuscripts

For peer review only

**Title:** The cost of hospitalised patients due to complicated urinary tract infections – A retrospective observational study in countries with high prevalence of multidrug resistant Gram-negative bacteria: the COMBACTE-MAGNET, RESCUING study

**Authors:**

Laura Vallejo-Torres<sup>1,2\*</sup>, Miquel Pujol<sup>3,4</sup>, Evelyn Shaw<sup>3,4</sup>, Irith Wiegand<sup>5</sup>, Joan Miquel Vigo<sup>6</sup>, Margaret Stoddart<sup>7</sup>, Sally Grier<sup>7</sup>, Julie Gibbs<sup>7</sup>, Christiane Vank<sup>5</sup>, Nienke Cuperus<sup>8</sup>, Leo van den Heuvel<sup>8</sup>, Noa Eliakim-Raz<sup>9</sup>, Jordi Carratala<sup>3,4</sup>, Cuong Vuong<sup>5</sup>, Alasdair MacGowan<sup>7</sup>, Tanya Babich<sup>9</sup>, Leonard Leibovici<sup>9</sup>, Ibronke Addy<sup>5</sup>, Steve Morris<sup>1</sup>, on behalf of RESCUING Study Group and Study Sites<sup>^</sup>

<sup>1</sup>UCL Department of Applied Health Research. University College London, London, UK

<sup>2</sup>Departamento de Métodos Cuantitativos en Economía y Gestión. Universidad de Las Palmas de Gran Canaria, Las Palmas de Gran Canaria, Spain

<sup>3</sup>Infectious diseases Department. Hospital Universitari de Bellvitge-IDIBELL, Barcelona, Spain

<sup>4</sup>Spanish Network for the Research in Infectious Diseases (REIPI RD12/0015), Instituto de Salud Carlos III, Madrid, Spain

<sup>5</sup>AiCuris Anti-infective Cures GmbH, Wuppertal, Germany.

<sup>6</sup>Informatics Unit, Fundació Institut Català de Farmacologia, Barcelona, Spain

<sup>7</sup>Department of Medical Microbiology, Southmead Hospital, North Bristol NHS Trust, Bristol, UK

<sup>8</sup>Julius Center for Health Sciences and Primary Care, University Medical Center  
Utrecht, Utrecht, Netherlands.

<sup>9</sup>Department of Medicine E, Beilinson Hospital, Rabin Medical Center, Petah-Tiqva,  
Israel Sackler Faculty of Medicine, Tel-Aviv University, Petah Tikva, Israel.

<sup>^</sup>Membership of the RESCUING Study Group and Study Sites is provided in the  
Acknowledgments.

**\*Corresponding author**

Laura Vallejo Torres

Postal address: UCL Department of Applied Health Research. University College  
London, Gower Street, London WC1E 6BT, UK

Telephone: +34 928 458 228

Email: [laura.vallejotorres@sescs.es](mailto:laura.vallejotorres@sescs.es)

Fax: NA

**Keywords:**

Urinary tract infections; health economics; cost of illness

**Word count:** 3474

## Abstract

*Objective:* Complicated urinary tract infections (cUTI) impose a high burden on healthcare systems and are a frequent cause of hospitalisation. The aims of this paper are to estimate the cost per episode of patients hospitalised due to cUTI and to explore the factors associated with cUTI-related healthcare costs in eight countries with high prevalence of multidrug resistance (MDR).

*Design:* This is a multinational observational, retrospective study. The mean cost per episode was computed by multiplying the volume of healthcare use for each patient by the unit cost of each item of care, and summing across all components. Costs were measured from the hospital perspective. Patient-level regression analyses were used to identify the factors explaining variation in cUTI-related costs.

*Setting:* The study was conducted in 20 hospitals in 8 countries with high prevalence of multidrug resistant Gram-negative bacteria (Bulgaria, Greece, Hungary, Israel, Italy, Romania, Spain and Turkey).

*Participants:* Data were obtained from 644 episodes of patients hospitalised due to cUTI.

*Results:* The mean cost per case was 5,700€, with considerable variation between countries (largest value 7,740€ in Turkey; lowest value 4,028€ in Israel), mainly due to differences in length of hospital stay. Factors associated with higher costs per patient were: type of admission, infection source, infection severity, the Charlson comorbidity index and presence of MDR.

*Conclusions:* The mean cost per hospitalised case of cUTI was substantial and varied significantly between countries. A better knowledge of the reasons for variations in length of stays could facilitate a better standardised quality of care for patients with cUTI and allow a more efficient allocation of healthcare resources. Urgent admissions,

1  
2  
3 infections due to an indwelling urinary catheterisation, resulting in septic shock or  
4 severe sepsis, in patients with comorbidities and presenting MDR were related to a  
5 higher cost.  
6  
7  
8  
9  
10  
11

## 12 **Strengths and limitations of the study**

- 15 • This is the first study to examine costs of hospitalised patients due to cUTI from  
16 a multinational point of view.
- 17 • It is focused on countries with a high prevalence of MDR bacteria where cUTI  
18 impose a significant burden.
- 19 • The study estimates the mean cost per case from a bottom-up perspective,  
20 which provided a high level of granularity and the basis for the assessment of  
21 sources of variation and drivers of healthcare costs.
- 22 • The design of the study did not include a control group to assess the extra  
23 length of stay and excess costs of patients who are admitted to hospital due to  
24 a different condition and develop UTI during their hospitalisation.
- 25 • Country-specific unit cost data was not appropriate for most countries and  
26 therefore we applied the same set of unit costs, as estimated in one country,  
27 Spain, to the rest of the countries.  
28  
29  
30  
31  
32  
33  
34  
35  
36  
37  
38  
39  
40  
41  
42  
43

## 44 **INTRODUCTION**

45  
46 Urinary tract infections (UTIs) are highly prevalent worldwide. UTIs that occur in a  
47 normal genitourinary tract with no prior instrumentation are considered uncomplicated,  
48 whereas complicated UTIs (cUTIs) are associated with structural or functional  
49 abnormalities of the genitourinary tract or an underlying disease that interferes with  
50 host defence [1]. cUTIs are a frequent cause of hospitalisation as well as a common  
51  
52  
53  
54  
55  
56  
57  
58  
59  
60

1  
2  
3 complication during hospitalisation and have shown a higher prevalence of  
4 antimicrobial resistance compared to uncomplicated UTI [2]. Due to the rapid  
5 emergence and dissemination of resistance to antimicrobial agents, leading in some  
6 cases to multidrug resistance (MDR), some patients with cUTI are left with few  
7 therapeutic options and may progress to more serious stages of the disease [3].  
8  
9

10  
11  
12  
13 Currently, information about the burden of cUTI is scarce. Reports from the USA show  
14 that in the year 2000 cUTI accounted for more than 100,000 hospital admissions, often  
15 as a result of pyelonephritis [4]. Data from Europe are very limited, although the last  
16 point prevalence survey of European acute care hospitals estimated the prevalence of  
17 healthcare-associated infections (HAIs) to be 6%; of these, UTI was the third most  
18 common infection (19%) [5]. Based on these point prevalence data, the annual health  
19 burden of hospitalised UTI patients was estimated to be 81.2 disability-adjusted life  
20 years (DALYs) per 100,000 individuals in the general population [6].  
21  
22  
23  
24  
25  
26  
27  
28  
29

30  
31 Despite this high burden to healthcare systems and the increased pressure for cost  
32 containment in healthcare, few studies have examined the costs of cUTIs. Some  
33 papers have measured the cost of community-acquired UTIs [7, 8, 9, 10] and  
34 nosocomial UTIs [11, 12], or both [13]. Most of these studies were conducted in the  
35 USA [7, 8, 11, 12, 13], while studies undertaken in European countries have mainly  
36 focused on women visiting primary care settings with suspected UTIs [9, 10]. Some  
37 papers have estimated the impact of extended-spectrum beta-lactamase (ESBL)-  
38 producing *Escherichia coli* (*E. coli*) on the cost of UTI episodes requiring hospitalisation  
39 [14, 15]. Estimating the magnitude of the financial impact of this prevalent and  
40 potentially avoidable condition is particularly useful for measuring the potential cost  
41 savings from averting a case, thereby emphasising the importance of prevention and  
42 the sizeable economic consequences of MDR. In addition, cost estimates might inform  
43 cost-effectiveness analyses that require data on episode costs in order to compare  
44 alternative courses of treatment related to this condition. Therefore, there is a need for  
45  
46  
47  
48  
49  
50  
51  
52  
53  
54  
55  
56  
57  
58  
59  
60



1  
2  
3 data on the economic burden imposed to healthcare systems due to hospitalised cUTI  
4 patients, especially in countries with high prevalence of MDR.  
5  
6

7 In this paper we present an analysis of the economic burden of cUTI in seven  
8 European countries plus Israel, all of which have a high prevalence of MDR. The aims  
9 of this study are to estimate the cost per case of hospitalised patients due to cUTI and  
10 to investigate the factors associated with cUTI-related health care costs.  
11  
12  
13  
14  
15

16 The analyses reported in this paper are part of a larger project, “REtrospective  
17 observational Study to assess the clinical management and outcomes of hospitalised  
18 patients with Complicated Urinary tract INfection in countries with high prevalence of  
19 multidrug resistant Gram-negative bacteria (RESCUING study)”, with an overall aim of  
20 providing information about the epidemiology, clinical management, outcomes and  
21 healthcare costs of patients hospitalised with cUTI.  
22  
23  
24  
25  
26  
27  
28

## 29 **MATERIALS AND METHODS**

### 30 **Setting**

31  
32 This is a multinational observational, retrospective study conducted in 20 hospitals in 8  
33 countries (Bulgaria, Greece, Hungary, Israel, Italy, Romania, Spain and Turkey). Data  
34 were collected on patients who had a diagnosis of cUTI as the primary cause of  
35 hospitalisation and patients hospitalised for another reason but who developed cUTI  
36 during their hospitalisation from January 2013 to December 2014, based on ICD-9 and  
37 ICD-10 codes (ICD-9 CM Codes: 590.1, 590.10, 590.11, 590.2, 590.8, 590.80, 590.9,  
38 595.0, 595.89, 595.9, 599.0; ICD-10 CM Codes: N10, N12, N13.6, N15.1, N15.9,  
39 N30.0, N30.8, N30.9, N39.0). The study protocol has been published elsewhere [16].  
40  
41  
42  
43  
44  
45  
46  
47  
48  
49  
50

51 In order to avoid selection bias, all consecutive patients who had ICD-9 or ICD-10 CM  
52 codes were reviewed at each site. All patients who met the inclusion criteria as  
53 described in [16] were selected for data collection. The analysis presented in this paper  
54  
55  
56  
57  
58  
59  
60

1  
2  
3 focuses on patients admitted to hospital because of cUTI only; we do not include  
4 patients admitted for other reasons who developed cUTI during hospitalisation. The  
5 reason is that in the case of latter it is not possible to isolate the incremental cost of  
6 cUTI without a matched control group, i.e., comparing similar patients with and without  
7 cUTI during their hospital stay (see e.g. [17]).  
8  
9  
10  
11

### 12 **Study data collection**

13  
14  
15  
16 Data were collected retrospectively for all cUTI episodes at participating hospitals  
17 during the study period. Local ethical approval was obtained from each site. For all  
18 patients, a standardised set of information was recorded. This included demographics,  
19 comorbidities including those required to calculate a modified Charlson score [18],  
20 place of acquisition of infection, infection source and severity, microbiological data,  
21 imaging test data, infection management, antibiotic therapy, outcomes, details of  
22 discharge and readmissions. The follow-up period was 2 months after discharge from  
23 the admitting hospital  
24  
25  
26  
27  
28  
29  
30  
31

32  
33 The perspective of the cost analysis was the hospital provider, as we focus on  
34 hospitalised cUTI patients and this is where the majority of the cost burden falls [19,  
35 20].  
36  
37  
38

39  
40 Study size was defined based on the primary outcome measure of the main study, i.e.  
41 treatment failure rate between MDR bacteria and other pathogens [16].  
42  
43

### 44 **Estimating the cost per case of cUTI**

45  
46  
47 We collected information on healthcare resource utilisation attributed to cUTI for each  
48 episode in the dataset. The healthcare components collected were: *i*) length of hospital  
49 stay (LOS) (general ward, ICU), *ii*) diagnostic and follow up tests, *iii*) urological  
50 interventions and haemodialysis, *iv*) antibiotic treatment before, during and after  
51 hospitalisation, and *v*) hospital readmissions and outpatient visits within 60 days of  
52  
53  
54  
55  
56  
57  
58  
59  
60

1  
2  
3 discharge. For each component, a comprehensive list of specific items was compiled  
4 and reviewed by a clinical expert so that it included only healthcare resources that  
5 could be attributed to cUTI.  
6  
7

8  
9 Unit cost data for each cost item were collected for each country by means of a  
10 questionnaire sent to the principal investigators of all participating sites. The  
11 questionnaire was provided as an online and paper version, and included the list of all  
12 healthcare services identified for the management of cUTI (see Supplementary  
13 material 1). The response rate for the questionnaire was 90% (18 out of 20). We  
14 received at least one response from each country. However, despite efforts to facilitate  
15 the complete fulfilment and harmonisation of the questionnaires, responses from some  
16 of the sites had missing values for key healthcare costs items, such as the cost of a  
17 day in hospital and for the most frequent diagnostic tests and treatment procedures.  
18 Furthermore, some sites provided the data in terms of user charges instead of the cost  
19 incurred by the hospital in the provision of the services. As a result, we observed a  
20 large degree of variation in unit costs across sites that was not attributable only to  
21 differences in actual costs between regions. Therefore, we generated a single set of  
22 unit costs based on the mean values across three sites within the same country, Spain,  
23 which provided consistently estimated values reflecting hospital costs for all the items  
24 included in the questionnaire. Using a common set of unit costs across all patients  
25 means that any observed variation in costs is due to differences in healthcare resource  
26 use. We discuss the limitations of this approach in the discussion section.  
27  
28  
29  
30  
31  
32  
33  
34  
35  
36  
37  
38  
39  
40  
41  
42  
43  
44  
45

46 Unit cost data were attached to each item of healthcare use. For antibiotic therapy we  
47 estimated the cost per mg for each drug for which unit cost data was available, and  
48 applied the mean cost per mg to the remaining therapies. We estimated the cost per  
49 day with antibiotic therapy based on the dosage and frequency recorded for each drug,  
50 which was then combined with the duration of the treatment to estimate total antibiotic  
51 therapy costs. Patients might receive more than one antibiotic drug at the same time; in  
52  
53  
54  
55  
56  
57  
58  
59  
60

1  
2  
3 that case they count as separate antibiotic therapy days. Patients with total hospital  
4 LOS >200 days were excluded (3 observations) as these were deemed to be due to  
5 coding errors.  
6  
7

8  
9 We computed means and standard deviations as well as medians and interquartile  
10 ranges for the cost per case, and we quantified the contribution of each cost item and  
11 overall healthcare component to the total cost per case. We also present variations in  
12 the overall cost per case by country and for different cost components. All costs were  
13 reported in 2016 euros.  
14  
15  
16  
17  
18

19  
20 Costs were calculated for each case of cUTI requiring a hospital admission. If a patient  
21 required a second hospital admission, then if this occurred within 60 days of discharge  
22 of the first admission it was counted as a readmission and included in the cost of the  
23 first admission. If another admission occurred after 60 days post discharge (either of  
24 the index admission or a readmission) then this was counted as a separate case  
25 (observation) in the data.  
26  
27  
28  
29  
30  
31

### 32 **Factors associated with cUTI-related healthcare costs**

33  
34  
35 The analysis of the factors associated with cUTI-related healthcare costs was  
36 undertaken using multivariate regression analysis using patient level cost data. The  
37 dependent variable was total cost per patient estimated as described above.  
38  
39  
40

41  
42 To account for skewness of the cost data, generalised linear models with gamma  
43 family and log link were used [21]. We also considered using log Normal, Gaussian,  
44 inverse Gaussian and negative binomial distributions, but the gamma model gave the  
45 best fit in terms of the Akaike Information Criterion. The explanatory variables were  
46 demographic factors (age and gender), comorbidities measured by the Charlson  
47 morbidity index [18], admission characteristics (urgent versus elective; and admitted  
48 from home versus from another facility), infection severity (defined as septic shock or  
49 severe sepsis), source of infection (indwelling urinary catheterisation, pyelonephritis,  
50  
51  
52  
53  
54  
55  
56  
57  
58  
59  
60

1  
2  
3 and other sources), antibiotic resistance profile (defined as non-susceptibility to at least  
4 one agent in three or more antimicrobial categories [22]), episode number and 30-day  
5 mortality. We did not include as explanatory variables any of the variables used to  
6 construct the total cost per patient. We also exclude variables with a high collinearity  
7 ( $r>0.6$ ). We ran three sets of models: i) univariate regression models for each variable  
8 separately, ii) a multivariate model including all the covariates, and iii) a reduced  
9 multivariate model including only significant variables (where in the case of categorical  
10 variables, at least one indicator was non-significant). The variable selection in the  
11 reduced model was undertaken using forward and backward inclusion methods. P-  
12 values below the 5% level are regarded as statistically significant. Values between 5  
13 and 10% are regarded as weakly significant.

14  
15 For the quantitative interpretation of the effect of each variable, we computed marginal  
16 effects at the mean values of the included covariates. The impact of unobserved  
17 heterogeneity due to the hierarchical structure of the data is explored and accounted  
18 for by considering country fixed effects models. We also adjust for clustering at the site  
19 level and control for the patient episode number. Analyses were undertaken using  
20 Stata version 12.

## 21 22 23 24 25 26 27 28 29 30 31 32 33 34 35 36 37 38 **RESULTS**

### 39 40 41 **Study population characteristics**

42  
43 Data was collected on 653 cUTI episodes in 637 patients (mean number of episodes  
44 per patient, 1.04). There were missing data on LOS for nine episodes, so mean costs  
45 per case were computed for 644 cases.

46  
47  
48  
49  
50  
51 Fifty seven percent of the cohort were females and the mean age was 65.7 years  
52 (Table 1). Mean Charlson comorbidity score was 2.4. Ninety one percent of admissions  
53 were urgent (as opposed to elective) and 85% of the patients were admitted from home  
54 (as opposed from another facility). The infection source was indwelling urinary  
55  
56  
57  
58

catheterisation in 20% of cases, pyelonephritis in 27% of cases, and other sources (including anatomical urinary tract modification and obstructive uropathy) in the remaining 53%. Twenty six percent of the episodes were caused by MDR bacteria. The severity of the infection was categorised as severe sepsis or septic shock in 16% of cases. Five percent of the sample died within 30 days of discharge. The proportion of cases collected by each country ranged from 5% in Bulgaria to 26% in Israel.

**Table 1. Summary statistics of cohort characteristics and regression analysis results of total cost per cUTI episode**

|                                               | N (%)<br>Mean (SD) <sup>a</sup> | Univariate<br>analysis <sup>b</sup> | Multivariate<br>analysis -<br>Full model <sup>c</sup> | Multivariate<br>analysis -<br>Reduced<br>model <sup>d</sup> |
|-----------------------------------------------|---------------------------------|-------------------------------------|-------------------------------------------------------|-------------------------------------------------------------|
| <b>Demographics</b>                           |                                 |                                     |                                                       |                                                             |
| Age                                           | 65.7 (18.66) <sup>a</sup>       | 19.77                               | 11.76                                                 |                                                             |
| Female                                        | 371 (58%)                       | -796.06                             | 17.59                                                 |                                                             |
| <b>Type of admission</b>                      |                                 |                                     |                                                       |                                                             |
| Urgent (vs. Elective)                         | 585 (91%)                       | 458.91                              | 937.87**                                              | 991.32**                                                    |
| From home (vs. Other facility)                | 549 (85%)                       | -677.89                             | -577.62                                               |                                                             |
| <b>Infection source (vs. catheterisation)</b> |                                 |                                     |                                                       |                                                             |
| Pyelonephritis                                | 171 (27%)                       | -1,673.18***                        | -1,802.63***                                          | -1,891.57***                                                |
| Other source                                  | 344 (53%)                       | -821.88                             | -709.83                                               | -760.95*                                                    |
| <b>Infection severity (vs. other)</b>         |                                 |                                     |                                                       |                                                             |
| Septic shock/severe sepsis                    | 100 (16%)                       | 2,415.49***                         | 1,671.77***                                           | 1,587.57**                                                  |
| <b>Charlson Comorbidity Index</b>             |                                 |                                     |                                                       |                                                             |
|                                               | 2.4 (2.39) <sup>a</sup>         | 324.34***                           | 230.85**                                              | 263.48***                                                   |
| <b>Episode number</b>                         |                                 |                                     |                                                       |                                                             |
|                                               | 1.04 (0.24) <sup>a</sup>        | 1,394.33***                         | 355.91                                                |                                                             |
| <b>Mortality 30 days (yes vs. no)</b>         |                                 |                                     |                                                       |                                                             |
|                                               | 29 (5%)                         | 571.66                              | -934.75                                               |                                                             |
| <b>Multidrug resistant (yes vs. no)</b>       |                                 |                                     |                                                       |                                                             |
|                                               | 166 (26%)                       | 626.99                              | 475.92                                                | 581.41*                                                     |
| <b>Country (vs. Turkey)</b>                   |                                 |                                     |                                                       |                                                             |
| Greece                                        | 65 (10%)                        | -597.99                             | -1,503.81                                             | -1,263.11                                                   |
| Hungary                                       | 49 (8%)                         | -1,734.5**                          | -2,757.06***                                          | -2,768.68***                                                |
| Israel                                        | 170 (26%)                       | -3,612.37***                        | -4,242.55***                                          | -4,007.09***                                                |
| Italy                                         | 36 (6%)                         | -319.91                             | -1,065.03*                                            | -930.92                                                     |
| Romania                                       | 107 (17%)                       | -2,389.75***                        | -2,024.15***                                          | -1,931.49***                                                |
| Spain                                         | 126 (20%)                       | -819.22                             | -1,629.41***                                          | -1,422.96**                                                 |
| Bulgaria                                      | 31 (5%)                         | -2,520.07***                        | -2,853.38***                                          | -2,841.09***                                                |
| Pseudo-R <sup>2</sup>                         | N/A                             | N/A                                 | 0.111                                                 | 0.105                                                       |
| Sample size <sup>b</sup>                      | 644                             | 636 <sup>e</sup>                    |                                                       |                                                             |

Note:

\*p<0.1.\*\*p<0.05.\*\*\*p<0.01.

<sup>a</sup>Summary statistics for continuous variables are shown as mean and standard deviations; for categorical variables we present total number of observation and percentage.

<sup>b</sup>Marginal effects of univariate regression models for each variable separately.

<sup>c</sup>Marginal effects of a multivariate model including all the covariates.

dMarginal effect of a reduced multivariate model including only significant variables.

eThere are 8 cases with missing data on mortality at 30 days. Therefore, the sample used in the regression analyses includes 636 cases out of the 644 cases for whom data on cost per case was available.

## Estimating the cost per case of cUTI

Table 2 presents unit costs, resource use and total costs separately for each healthcare item as well as for each set of overall cost components. The mean (median) length of stay in hospital was 9 (7) days, and a small proportion of the total stay was in the ICU. Most patients had urine cultures, urinary sediment analyses and blood cultures undertaken, while imaging tests were rarely performed. The urological intervention most often performed was the insertion of an indwelling bladder-catheter. The mean number of antibiotic therapy days before, during and after hospitalisation were 2, 12 and 6 days, respectively. Nearly 10% of patients were readmitted to hospital due to a cUTI recurrence, with a mean readmission stay across the full sample of 1 day (11 days among the subsample of readmitted patients). The mean number of outpatient visits per patient within 60 days of hospital discharge was 0.8.

**Table 2. Cost per case by cost component – all countries combined**

|                             | Unit cost (€) | Resource use (units) |                | Total cost (€)   |                     | %     |
|-----------------------------|---------------|----------------------|----------------|------------------|---------------------|-------|
|                             |               | Mean (SD)            | Median [Q1-Q3] | Mean (SD)        | Median [Q1-Q3]      |       |
| <b>Length of stay</b>       |               |                      |                |                  |                     |       |
| General ward (days)         | 477.4         | 9.25 (8.49)          | 7 [5-11]       | 4,418.5 (4052.4) | 3,342 [2,387-5,252] | 77.4% |
| ICU (days)                  | 1,589.6       | 0.05 (1.19)          | 0 [0-0]        | 83.9 (1895.4)    | 0 [0-0]             | 1.5%  |
|                             |               | 9.30 (8.51)          | 7 [5-11]       | 4,502.4 (4389.9) | 3,342 [2,387-5,252] | 78.9% |
| <b>Diagnostic tests</b>     |               |                      |                |                  |                     |       |
| Urine culture test          | 15.1          | 1.51 (0.82)          | 1 [1-2]        | 22.8 (12.5)      | 15 [15-30]          | 0.4%  |
| Dipstick analysis           | 2.8           | 0.49 (0.85)          | 0 [0-1]        | 1.3 (2.3)        | 0 [0-3]             | 0.0%  |
| Urinary sediment analysis   | 2.6           | 1.02 (0.89)          | 1 [0-1]        | 2.6 (2.3)        | 3 [0-3]             | 0.0%  |
| Gram stain test             | 6.3           | 0.37 (0.68)          | 0 [0-1]        | 2.3 (4.2)        | 0 [0-6]             | 0.0%  |
| Blood culture               | 36.7          | 1.43 (1.56)          | 1 [0-2]        | 52.5 (57.1)      | 37 [0-73]           | 0.9%  |
| Abdominal Ultrasonography   | 48.9          | 0.71 (0.64)          | 1 [0-1]        | 34.5 (31.3)      | 49 [0-49]           | 0.6%  |
| CT Scan                     | 156.0         | 0.2 (0.46)           | 0 [0-0]        | 32 (72.5)        | 0 [0-0]             | 0.6%  |
| Pyelography                 | 105.1         | 0.02 (0.14)          | 0 [0-0]        | 2 (14.2)         | 0 [0-0]             | 0.0%  |
| MRI scan                    | 191.6         | 0 (0.07)             | 0 [0-0]        | 0.9 (13.1)       | 0 [0-0]             | 0.0%  |
|                             |               |                      |                | 151 (109)        | 115 [75-201]        | 2.6%  |
| <b>Treatment procedures</b> |               |                      |                |                  |                     |       |
| Insertion of catheter       | 50.0          | 0.36 (0.48)          | 0 [0-1]        | 17.8 (24)        | 0 [0-50]            | 0.3%  |

|                                                                                                                               |         |               |           |                      |                            |              |
|-------------------------------------------------------------------------------------------------------------------------------|---------|---------------|-----------|----------------------|----------------------------|--------------|
| Replacement of catheter                                                                                                       | 50.0    | 0.13 (0.38)   | 0 [0-0]   | 6.5 (19)             | 0 [0-0]                    | 0.1%         |
| Percutaneous nephrostomy                                                                                                      | 717.6   | 0.05 (0.26)   | 0 [0-0]   | 37.9 (183.8)         | 0 [0-0]                    | 0.7%         |
| Insertion of JJ-stent                                                                                                         | 907.0   | 0.05 (0.21)   | 0 [0-0]   | 40.8 (188.2)         | 0 [0-0]                    | 0.7%         |
| Abscess drainage                                                                                                              | 557.6   | 0.01 (0.12)   | 0 [0-0]   | 6.9 (69.2)           | 0 [0-0]                    | 0.1%         |
| Nephrectomy                                                                                                                   | 3,174.0 | 0.01 (0.08)   | 0 [0-0]   | 19.7 (249.6)         | 0 [0-0]                    | 0.3%         |
| Mechanical ventilation (days)                                                                                                 | 350.0   | 0.12 (0.99)   | 0 [0-0]   | 41.8 (346.4)         | 0 [0-0]                    | 0.7%         |
| Renal replacement (days)                                                                                                      | 254.7   | 0.16 (1.53)   | 0 [0-0]   | 41.9 (389.8)         | 0 [0-0]                    | 0.7%         |
|                                                                                                                               |         |               |           | 213.4 (764.8)        | 0 [0-50]                   | 3.7%         |
| <b>Antibiotic therapy</b>                                                                                                     |         |               |           |                      |                            |              |
| Before hospitalisation (days)                                                                                                 | 1.9     | 1.95 (5.84)   | 0 [0-0]   | 2.6 (20.6)           | 0 [0-0]                    | 0.0%         |
| During hospitalisation (days)                                                                                                 | 12.3    | 12.25 (61.37) | 7 [4-11]  | 197.8 (474.8)        | 19 [7-149]                 | 3.5%         |
| At discharge (days)                                                                                                           | 5.9     | 6 (13.61)     | 4.5 [0-8] | 24.1 (117.5)         | 2 [0-10]                   | 0.4%         |
|                                                                                                                               |         | 1.08 (4.53)   | 0 [0-0]   | 224.6 (490.3)        | 32 [14-199]                | 3.9%         |
| <b>After discharge</b>                                                                                                        |         |               |           |                      |                            |              |
| Readmission (days)                                                                                                            | 477.4   | 1.08 (4.53)   | 0 [0-0]   | 515.2 (2163.4)       | 0 [0-0]                    | 9.0%         |
| Outpatients (visits)                                                                                                          | 122.3   | 0.81 (1.62)   | 0 [0-1]   | 99.2 (197.8)         | 0 [0-122]                  | 1.7%         |
|                                                                                                                               |         |               |           | 614.4 (2197.5)       | 0 [0-245]                  | 10.8%        |
| <b>Total (first hospital admission only)</b>                                                                                  |         |               |           | <b>5,064 (4,847)</b> | <b>3,627 [2,531-5,985]</b> | <b>88.8%</b> |
| <b>Total (first hospital admission + antibiotic treatment before &amp; after discharge)</b>                                   |         |               |           | <b>5,091 (4,844)</b> | <b>3,651 [2,542-6,004]</b> | <b>89.2%</b> |
| <b>Total (hospital admission + antibiotic treatment before &amp; after discharge + readmissions &amp; outpatients visits)</b> |         |               |           | <b>5,705 (5,438)</b> | <b>3,919 [2,664-6,655]</b> | <b>100%</b>  |

\*Unit costs estimated from the three Spanish sites

The mean (median) costs per case were: *i*) including costs incurred during the first hospital admission: 5,064€ (3,627€); *ii*) *i*) plus antibiotic therapy before and after discharge: 5,091€ (3,651€); and *iii*) *ii*) plus outpatient visits and hospital readmissions within 60 days of discharge: 5,705€ (3,919€).

The cost per case was largely driven by the cost due to the length of stay in hospital, which accounted for nearly 80% of the total cost. This was followed by the contribution of the cost of readmissions and outpatient visits after discharge (11%), treatment procedures (4%), antibiotic therapy (4%) and diagnostic tests (3%).

There was variation in the mean cost per cUTI case by country, with a largest mean (median) value of 7,740€ (5,962€) in Turkey and a lowest value of 4,028€ (3,159€) in Israel (Table 3). Note that variations in total costs shown in this table are only due to variations in the management of patients with cUTI, including LOS, as unit costs of healthcare services are held constant across all countries. Table 3 also shows variations by cost components between countries. This suggests that differences in



LOS are the main reason of the observed differences in total costs between countries; the mean stay in hospital in a general ward varies from 6 days in Israel to 14 days in Italy.

**Table 3. Mean cost per case by cost component – by country**

|          | N   |                | Total cost<br>(€)   | LOS<br>(€) | DIAG<br>(€) | TREAT<br>(€) | ATB<br>(€) | DISCH<br>(€) | LOS<br>ward<br>(days) | LOS<br>ICU<br>(days) |
|----------|-----|----------------|---------------------|------------|-------------|--------------|------------|--------------|-----------------------|----------------------|
| Bulgaria | 31  | Mean (SD)      | 4,907 (4,130)       | 3,943      | 111         | 298          | 355        | 200          | 8.26                  | 0.00                 |
|          |     | Median [Q1-Q3] | 3,660 [3,187-5,258] | 2,865      | 84          | 0            | 25         | 245          | 6.00                  | 0.00                 |
| Greece   | 65  | Mean (SD)      | 7,039 (5,786)       | 5,670      | 221         | 251          | 586        | 311          | 11.88                 | 0.00                 |
|          |     | Median [Q1-Q3] | 5,581 [3,176-8,934] | 4,774      | 213         | 50           | 70         | 122          | 10.00                 | 0.00                 |
| Hungary  | 49  | Mean (SD)      | 5,656 (5,591)       | 4,044      | 170         | 519          | 35         | 888          | 8.47                  | 0.00                 |
|          |     | Median [Q1-Q3] | 3,765 [2,606-5,905] | 2,865      | 137         | 0            | 19         | 122          | 6.00                  | 0.00                 |
| Israel   | 170 | Mean (SD)      | 4,028 (2,843)       | 3,061      | 133         | 60           | 132        | 641          | 6.41                  | 0.00                 |
|          |     | Median [Q1-Q3] | 3,159 [2,254-4,666] | 2,387      | 110         | 50           | 16         | 0            | 5.00                  | 0.00                 |
| Italy    | 36  | Mean (SD)      | 7,221 (8,271)       | 6,525      | 173         | 38           | 431        | 54           | 13.67                 | 0.00                 |
|          |     | Median [Q1-Q3] | 5,052 [3,670-7,735] | 4,536      | 145         | 0            | 268        | 0            | 9.50                  | 0.00                 |
| Romania  | 107 | Mean (SD)      | 5,024 (3,636)       | 4,493      | 107         | 10           | 125        | 288          | 9.41                  | 0.00                 |
|          |     | Median [Q1-Q3] | 4,314 [3,096-5,849] | 3,819      | 97          | 0            | 37         | 0            | 8.00                  | 0.00                 |
| Spain    | 126 | Mean (SD)      | 6,674 (6,200)       | 4,706      | 193         | 342          | 153        | 1,281        | 9.86                  | 0.00                 |
|          |     | Median [Q1-Q3] | 3,992 [2,705-8,696] | 3,103      | 141         | 0            | 45         | 122          | 6.50                  | 0.00                 |
| Turkey   | 60  | Mean (SD)      | 7,740 (8,006)       | 6,359      | 105         | 512          | 387        | 376          | 11.43                 | 0.57                 |
|          |     | Median [Q1-Q3] | 5,962 [3,375-9,061] | 4,774      | 106         | 50           | 101        | 0            | 9.00                  | 0.00                 |

\*Holding unit costs constant. LOS = Length of stay; DIAG = Diagnostic test; TREAT = Treatment procedures; ATB = Antibiotic therapy; DISCH = After discharge (readmission and outpatient visits); ICU = Intensive Care Unit

### Factors associated with cUTI-related health care costs

The statistically significant drivers of cUTI-related healthcare costs were (Table 1): type of admission (with urgent admissions exhibiting a higher cost than elective admissions); source of infection (with catheterisation associated to higher costs compared with other sources); the infection severity (septic shock and severe sepsis showing a larger cost); the Charlson comorbidity index (with larger values associated to a higher cost); MDR profile (episodes presenting MDR showing a higher cost; only significant at 10% significance level); and country (with most countries exhibiting a significant lower cost than Turkey).

## DISCUSSION

In this study we have measured the cost per episode of patients hospitalised due to cUTI in eight countries with high prevalence of MDR, and explored the factors that explained variations in cUTI-related healthcare costs. The mean cost per hospitalised cUTI case in our data was estimated as 5,700€, corresponding to the costs of a hospital stay of 9 days on average and including the costs of specific diagnostic and treatment procedures, as well as antibiotic therapy, readmissions due to cUTI reoccurrence and outpatient visits after discharge. The cost per case varied across countries, mainly due to differences in LOS in hospital among patients with cUTI.

Over and above differences across countries, our analysis also identifies a series of factors associated with higher cUTI-related healthcare costs. Urgent admissions, for infections due to an indwelling urinary catheterisation, resulting in septic shock or severe sepsis, in patients with a higher comorbidity index and presenting MDR were related to a higher cost.

Our findings are in line with previous studies that have focused on similar patient groups. Esteve-Palau et al. 2015 [15] estimated a mean cost per patient hospitalised with symptomatic UTI caused by ESBL-producing *E. coli* of 4,980€ in one hospital in Spain, excluding readmissions. The cost was significantly lower, 2,612€, among patients with UTI due to non ESBL-producing *E. coli*. Cardwell et al. 2016 [13] analysed data on adults patients with a discharged diagnosis code for UTI in one hospital in the USA and found a mean hospitalisation cost of \$7,586. The costs of nosocomial UTI infections and UTI infections seen in primary care have been shown to be lower. For instance, Saint, 2000 estimated the incremental cost of nosocomial UTIs of \$676 and catheter-related bacteremia of \$2,836 per case [12]. Tambyah et al., 2002 reported that the mean incremental hospitalisation cost attributable to nosocomial catheter-associated UTI was \$589 [11]. On the other hand, studies that focused on UTI

1  
2  
3 infections treated in primary care have reported a mean cost between 70€ [9] and 236€  
4 [10] per episode.  
5

6  
7 This is the first study to examine costs of hospitalised patients due to cUTI from a  
8 multinational point of view. Moreover, it is focused on countries with a high prevalence  
9 of MDR bacteria where cUTI impose a significant burden. In addition, the study  
10 estimated the mean cost per case from a bottom-up perspective, which provided a high  
11 level of granularity and the basis for the assessment of sources of variation and drivers  
12 of healthcare costs. However, the study also has a number of limitations. The design of  
13 the study did not include a control group to assess the extra length of stay and excess  
14 costs of patients who are admitted to hospital due to a different condition and develop  
15 UTI during their hospitalisation. Therefore, we focused in this paper on the analysis of  
16 patients who are admitted because of a cUTI. This is to avoid the overestimation that  
17 would result among cases admitted for other reasons for whom we cannot isolate the  
18 incremental costs that are due to cUTI only. A second limitation of the analysis is that,  
19 as discussed in the Methods section, country-specific unit cost data was not  
20 appropriate for most countries and therefore we applied the same set of unit costs, as  
21 estimated in one country, Spain, to the rest of the countries. While this approach  
22 allowed us to explore variations in healthcare costs that are due to differences in the  
23 management of cUTI patients across countries rather than due to differences in the unit  
24 costs of services, it limits the validity of the country-specific estimates. Related to this  
25 latter point, we also acknowledge that the number of observations included in the study  
26 for some countries is low, ranging from 31 to 170, which might restrict the  
27 generalisability of country-specific findings. The explanatory power of our models was  
28 also found to be low, which might suggest that there are other factors not captured by  
29 the observed variables included in our models that explain variation in health-care  
30 costs, such as hospital policy on LOS. Finally, the perspective of the analysis was that  
31 of the hospital provider, however if a societal perspective was considered wider costs  
32  
33  
34  
35  
36  
37  
38  
39  
40  
41  
42  
43  
44  
45  
46  
47  
48  
49  
50  
51  
52  
53  
54  
55  
56  
57  
58  
59  
60

1  
2  
3 related to cUTI should had been taken into account such as patients' costs and  
4 productivity losses due to illness, as well as cost incurred by primary care settings;  
5 including these costs would increase the costs of cUTI.  
6  
7

8  
9 In conclusion, this study showed the costs of patients hospitalised due to cUTI are  
10 substantial, but identified wide differences between countries, especially due to  
11 differences in length of stay in the hospital. These findings suggest that a better  
12 knowledge of the reasons for longer length of stays in some countries could facilitate a  
13 better standardised quality of care for patients with cUTI and to allow a more efficient  
14 allocation of healthcare resources. The factors associated with higher cUTI-related  
15 healthcare costs identified by this study also shed light onto some implications for  
16 policy and planning. Prompting preventive measures to minimise cost of hospitalisation  
17 might be aimed at increasing the population's knowledge of symptoms and signs of  
18 infection, in order to encourage patients to attend primary care facilities earlier,  
19 especially those with comorbidities or indwelling urinary catheters, and thus to avoid  
20 the development of severe forms of illness after the onset of symptoms and avoid the  
21 need for urgent admissions.  
22  
23  
24  
25  
26  
27  
28  
29  
30  
31  
32  
33  
34  
35  
36  
37

### 38 **Acknowledgments**

39  
40 We thank the RESCUING Study Group and Study Sites principal investigators: Dora  
41 Tancheva, Rossitza Vatcheva-Dobrevska, Sotirios Tsiodras, Emmanuel Rollides,  
42 Istvan Várkonyi, Judit Bodnár, Aniko Farkas, Mical Paul, Yehuda Carmeli, Emanuele  
43 Durante Mangoni, Cristina Mussini, Nicola Petrosillo, Andrei Vata, Adriana Hristea,  
44 Julia Origüen, Jesus Rodriguez-Baño, ArzuYetkin, and Nese Saltoglu.  
45  
46  
47  
48  
49  
50

### 51 **Competing interests statement:**

52  
53 Within the IMI project, AiCuris provided support for the institutions of the following  
54 Researchers: LVT, MP, ES, JMV, MS, SG, JG, NC, LH, NER, JC, AM, TB, LL, and  
55  
56  
57

1  
2  
3 SM. IW, CV, CV, and IA are employees of AiCuris Anti-infective Cures GmbH, an  
4 EFPIA (European Federation of Pharmaceutical Industries and Association) member  
5 in the IMI JU. Costs related to the research contribution by IW, CV, CV and IA are  
6 borne by AiCuris Anti-infective Cures GmbH and considered in-kind contribution under  
7 the IMI JU scheme.  
8  
9  
10  
11  
12  
13

### 14 **Funding statement**

15  
16 This research project receives support from the Innovative Medicines Initiative Joint  
17 Undertaking under grant agreement n° 115523 | 115620 | 115737 resources of which  
18 are composed of financial contribution from the European Union Seventh Framework  
19 Programme (FP7/2007-2013) and EFPIA companies in kind contribution. The research  
20 leading to these results was conducted as part of the COMBACTE-MAGNET  
21 consortium. For further information please refer to [www.COMBACTE.com](http://www.COMBACTE.com).  
22  
23  
24  
25  
26  
27  
28  
29

### 30 **Authors' contribution**

31  
32 Conceptualisation: LVT, MP, ES, IW, JMV, MS, SG, JG, CV, NC, LvdH, NER, JC, CV,  
33 AM, TB, LL, IA, SM; Acquisition of data: LVT, MP, ES, IW, JMV, MS, SG, JG, CV, NC,  
34 LvdH, NER, JC, CV, AM, TB, LL, IA, SM; Analysis of data: LVT, MP, ES, LL, SM;  
35 Writing—original draft preparation: LVT, MP, ES, LL, SM; Writing—review and editing:  
36 LVT, MP, ES, IW, JMV, MS, SG, JG, CV, NC, LvdH, NER, JC, CV, AM, TB, LL, IA, SM;  
37 Agree with manuscript results and conclusions: LVT, MP, ES, IW, JMV, MS, SG, JG,  
38 CV, NC, LvdH, NER, JC, CV, AM, TB, LL, IA, SM  
39  
40  
41  
42  
43  
44  
45  
46  
47

### 48 **Data sharing statement**

49 Data are available through the authors upon request (and from the Dryad repository in  
50 due course).  
51  
52  
53  
54  
55  
56  
57  
58  
59  
60

## References

1. Lichtenberger P, Hooton TM. Complicated urinary tract infections. *Curr Infect Dis Rep* 2008;**10**(6):499-504.
2. Nicolle LE. A practical guide to the management of complicated urinary tract infection. *Drugs* 1997;**53**:583-92.
3. Levison ME, Kaye D. Treatment of complicated urinary tract infections with an emphasis on drug-resistant gram-negative uropathogens. *Curr Infect Dis Rep* 2013;**15**:109-15.
4. Foxman B. Epidemiology of urinary tract infections: incidence, morbidity, and economic costs. *Am J Med* 2002; **113**(Suppl 1A):5S-13S.
5. European Centre for Disease prevention and Control. Point prevalence survey of healthcare-associated infections and antimicrobial use in European acute care hospitals. Stockholm: ECDC; 2013.  
<http://ecdc.europa.eu/en/publications/Publications/healthcare-associated-infections-antimicrobial-use-PPS.pdf>.
6. Cassini A, Plachouras D, Eckmanns T, Abu Sin M, Blank HP, Ducombe T, Haller S, Harder T, Klingeberg A, Sixtensson M, Velasco E, Weiß B, Kramarz P, Monnet DL, Kretzschmar ME, Suetens C. Burden of Six Healthcare-Associated Infections on European Population Health: Estimating Incidence-Based Disability-Adjusted Life Years through a Population Prevalence-Based Modelling Study. *PLoS Med* 2016;**18**;13(10):e1002150
7. Rosenberg M. Pharmacoeconomics of treating uncomplicated urinary tract infections. *Int J Antimicrob Agents* 1999;**11**(3-4):247-51
8. Foxman B, Barlow R, D'Arcy H, Gillespie B, Sobel JD. Urinary tract infection: self-reported incidence and associated costs. *Ann Epidemiol* 2000;**10**(8):509-15.

- 1  
2  
3 9. François M, Hanslik T, Dervaux B, Le Strat Y, Souty C, Vaux S, Maugat S,  
4  
5 Rondet C, Sarazin M, Heym B, Coignard B, Rossignol L. The economic burden  
6  
7 of urinary tract infections in women visiting general practices in France: a cross-  
8  
9 sectional survey. *BMC Health Serv Res* 2016;**16**:365
- 10  
11 10. Ciani O, Grassi D, Tarricone R. An Economic Perspective on Urinary Tract  
12  
13 Infection: The “Costs of Resignation”. *Clin Drug Investig* 2013;**33**:255–261
- 14  
15 11. Tambyah PA, Knasinski V, Maki DG. The direct costs of nosocomial catheter-  
16  
17 associated urinary tract infection in the era of managed care. *Infect Control*  
18  
19 *Hosp Epidemiol* 2002;**23**(1):27-31.
- 20  
21 12. Saint S. Clinical and economic consequences of nosocomial catheter-related  
22  
23 bacteriuria. *Am J Infect Control* 2000;**28**(1):68-75.
- 24  
25 13. Cardwell SM, Crandon JL, Nicolau DP, McClure MH, Nailor MD. Epidemiology  
26  
27 and economics of adult patients hospitalized with urinary tract infections. *Hosp*  
28  
29 *Pract* 2016;**44**(1):33-40.
- 30  
31 14. MacVane SH, Tuttle LO, Nicolau DP. Impact of extended-spectrum  $\beta$ -  
32  
33 lactamase-producing organisms on clinical and economic outcomes in patients  
34  
35 with urinary tract infection. *J Hosp Med* 2014;**9**(4):232-8.
- 36  
37 15. Esteve-Palau E, Solande G, Sánchez F, Sorlí L, Montero M, Güerri R, et al.  
38  
39 Clinical and economic impact of urinary tract infections caused by ESBL-  
40  
41 producing Escherichia coli requiring hospitalization: A matched cohort study. *J*  
42  
43 *Infect* 2015; **71**:667-74.
- 44  
45 16. Shaw E, Addy I, Stoddart M, Vank C, Grier S, Wiegand I, Leibovici L, Eliakim-  
46  
47 Raz N, Vallejo-Torres L, Morris S, MacGowan A, Carratalà J, Pujol M;  
48  
49 COMBACTE-MAGNET Consortium. Retrospective observational study to  
50  
51 assess the clinical management and outcomes of hospitalised patients with  
52  
53 complicated urinary tract infection in countries with high prevalence of multidrug  
54  
55 resistant Gram-negative bacteria (RESCUING). *BMJ Open*  
56  
57 2016;**29**;6(7):e011500.

- 1  
2  
3 17. Roberts RR, Scott RD 2nd, Hota B, Kampe LM, Abbasi F, Schabowski S,  
4 Ahmad I, Ciavarella GG, Cordell R, Solomon SL, Hagtvedt R, Weinstein RA.  
5 Costs attributable to healthcare-acquired infection in hospitalized adults and a  
6 comparison of economic methods. *Med Care* 2010; **48**(11):1026-35.  
7  
8  
9  
10 18. Charlson ME, Pompei P, Ales KL, et al. A new method of classifying prognostic  
11 comorbidity in longitudinal studies: development and validation. *J Chronic Dis*  
12 1987;**40**:373–83.  
13  
14  
15 19. Turner RM, Wu B, Lawrence K, et al. Assessment of outpatient and inpatient  
16 antibiotic treatment patterns and health care costs of patients with complicated  
17 urinary tract infections. *Clin Ther* 2015;**37**:2037–47.  
18  
19  
20 20. Bader MS, Hawboldt J, Brooks A. Management of complicated urinary tract  
21 infections in the era of antimicrobial resistance. *Postgrad Med* 2010;**122**:7–15.  
22  
23  
24 21. Barber J, Thompson S. Multiple regression of cost data: use of generalised  
25 linear models. *J Health Serv Res Policy* 2004;**9**:197-204.  
26  
27  
28 22. Magiorakos AP, Srinivasan A, Carey RB, Carmeli Y, Falagas ME, Giske CG et  
29 al. Multidrug-resistant, extensively drug-resistant and pandrug-resistant  
30 bacteria: an international expert proposal for interim standard definitions for  
31 acquired resistance. *Clin Microbiol Infect*. 2012; **18**:268-81  
32  
33  
34  
35  
36  
37  
38  
39  
40  
41  
42  
43  
44  
45  
46  
47  
48  
49  
50  
51  
52  
53  
54  
55  
56  
57  
58  
59  
60



1  
2  
3 **1 S1. Unit costs questionnaire**  
4

5  
6 2

7  
8 3 **RESCUING ECONOMIC FORM**  
9

10  
11 4 In the questionnaire below we ask for the unit costs of health care resources and services for  
12 5 the diagnosis, treatment and supportive care related to the management of cUTI. This  
13 6 information will allow us to estimate the cost per case as well as the total national burden of  
14 7 cUTI in your country. The questionnaire allows you to save the information already entered and  
15 8 to continue later. By using the same URL/web address, you will be able to continue where you  
16 9 left off.  
17  
18  
19  
20  
21

22 10

23  
24  
25 11 What is the monetary unit you report in this form?  
26

27 12  Euro  
28

29  
30 13  Other: \_\_\_\_\_  
31  
32

33 14

34  
35 15 **Hospital stays and visits**  
36

37  
38 16 Please provide the unit cost per hospital stay day and outpatient visit in your hospital. Ideally we  
39 17 request the cost specifically among patients with cUTI (for example, the average cost among  
40 18 patients with discharge codes related to cUTI, e.g. ICD-9 CM Codes 590.1, 590.10, 590.11,  
41 19 590.2, 590.8, 590.80, 590.9, 595.0, 595.89, 595.9, 599.0). If you are unable to provide the unit  
42 20 cost specifically for cUTI patients, please provide the average unit cost for the speciality that  
43 21 cUTI patients are treated in in your hospital (e.g., one of urology, gynaecology, general  
44 22 medicine). If costs are not available by specialty then please provide the average unit costs data  
45 23 across all patients in your hospital. Please specify the details of the data you are providing, such  
46 24 as the patients' ICD codes you used to compute the unit costs or whether the values are related  
47 25 to all types of patients.  
48  
49  
50  
51  
52  
53  
54  
55  
56  
57  
58  
59  
60

26 Please fill in the table with the costs at your hospital even if you do not have data specifically for  
 27 cUTI patients; it will be very useful for us, provided you explain in the Details section what these  
 28 costs refer to.

29

|                                        | Cost per day/visit | Details |
|----------------------------------------|--------------------|---------|
| Hospital stay per diem in general ward |                    |         |
| Hospital stay per diem in ICU          |                    |         |
| Outpatient hospital visit              |                    |         |

30

31

32

### 33 **Procedures**

34 Please provide the unit costs of the following procedures in your hospital. Next to each  
 35 procedure we indicate the ICD9-CM procedures codes to make it simpler for you to identify the  
 36 procedures we are interested in. Please specify the details of the data you are providing, such  
 37 as the ICD9 codes or the specific name of the procedure you are providing data for.

38 If you have more than one cost for each procedure please provide the mean, ideally based on  
 39 the proportion of patients receiving each procedure.

| Procedure [ICD9-CM code]         | Cost per procedure | Details |
|----------------------------------|--------------------|---------|
| Urine culture [9132]             |                    |         |
| Dipstick analysis [9139]         |                    |         |
| Urinary sediment analysis [9133] |                    |         |
| Gram stain test [9131]           |                    |         |
| Blood culture [9052]             |                    |         |

|                                                    |              |         |
|----------------------------------------------------|--------------|---------|
| Abdominal Ultrasonography [8876]                   |              |         |
| CT Scan [9218, 9219]                               |              |         |
| Pyelography [8773, 8774, 8775]                     |              |         |
| MRI scan [8895]                                    |              |         |
| Insertion of an indwelling bladder-catheter [5794] |              |         |
| Percutaneous nephrostomy [5503, 5504]              |              |         |
| Insertion of JJ-stent [598]                        |              |         |
| Abscess drainage [472, 5491]                       |              |         |
| Nephrectomy [5501, 5502]                           |              |         |
|                                                    | Cost per day | Details |
| Invasive mechanical ventilation [9670, 9671, 9672] |              |         |
| Dialysis/Renal replacement therapy [3995, 5498]    |              |         |

40

41

42

43 **Antibiotic therapy**

44 Please provide for the antibiotic therapies listed below the unit cost per dose and specify the  
 45 relevant dose. Please respond only for the antibiotics used in your hospital, and if there are  
 46 other antibiotics used frequently in your hospital which are not included in this list, please add  
 47 them in the space provided.

| Antibiotic (intravenous (IV)/oral administration) | Dose    | Cost per dose |
|---------------------------------------------------|---------|---------------|
| AMIKACIN (IV)                                     | 500 mg  |               |
| AMOXICILLIN (oral)                                | 500 mg  |               |
| AMOXICILLIN (oral)                                | 750 mg  |               |
| AMOXICILLIN (ORAL)                                | 1000 MG |               |

|    |                                    |             |  |
|----|------------------------------------|-------------|--|
| 1  |                                    |             |  |
| 2  |                                    |             |  |
| 3  | AMOXICILLIN/CLAVULANIC ACID (IV)   | 1000/200 mg |  |
| 4  | AMOXICILLIN/CLAVULANIC ACID (oral) | 500/125 mg  |  |
| 5  |                                    |             |  |
| 6  | AMOXICILLIN/CLAVULANIC ACID (oral) | 875/125 mg  |  |
| 7  |                                    |             |  |
| 8  | AMPICILLIN (IV)                    | 1000 mg     |  |
| 9  |                                    |             |  |
| 10 | CEFIXIME (oral)                    | 400 mg      |  |
| 11 |                                    |             |  |
| 12 | CEFIXIME (oral)                    | 200 mg      |  |
| 13 |                                    |             |  |
| 14 | CEFTAZIDIME (IV)                   | 2000 mg     |  |
| 15 |                                    |             |  |
| 16 | CEFTRIAZONE (IV)                   | 1000 mg     |  |
| 17 |                                    |             |  |
| 18 | CEFUROXIME (IV)                    | 750 mg      |  |
| 19 |                                    |             |  |
| 20 | CEFUROXIME (oral)                  | 500 mg      |  |
| 21 |                                    |             |  |
| 22 | CEFUROXIME (oral)                  | 250 mg      |  |
| 23 |                                    |             |  |
| 24 | CIPROFLOXACIN (oral)               | 500 mg      |  |
| 25 |                                    |             |  |
| 26 | CIPROFLOXACIN (oral)               | 750 mg      |  |
| 27 |                                    |             |  |
| 28 | CIPROFLOXACIN (IV)                 | 200 mg      |  |
| 29 |                                    |             |  |
| 30 | COLISTIN (IV)                      | 1 MUI       |  |
| 31 |                                    |             |  |
| 32 | CO-TRIMOXAZOL (oral)               | 400/80 mg   |  |
| 33 |                                    |             |  |
| 34 | CO-TRIMOXAZOLE (IV)                | 800/160 mg  |  |
| 35 |                                    |             |  |
| 36 | CO-TRIMOXAZOLE (IV)                | 400/80 mg   |  |
| 37 |                                    |             |  |
| 38 | CO-TRIMOXAZOLE (oral)              | 800/160 mg  |  |
| 39 |                                    |             |  |
| 40 | DAPTOMYCIN                         | 500 mg      |  |
| 41 |                                    |             |  |
| 42 | ERTAPENEM (IV)                     | 1000 mg     |  |
| 43 |                                    |             |  |
| 44 | FOSFOMYCIN (IV)                    | 1000 mg     |  |
| 45 |                                    |             |  |
| 46 | FOSFOMYCIN (IV)                    | 4000 mg     |  |
| 47 |                                    |             |  |
| 48 | FOSFOMYCIN (oral)                  | 500 mg      |  |
| 49 |                                    |             |  |
| 50 | FOSFOMYCIN TROMETANOL (oral)       | 3000 mg     |  |
| 51 |                                    |             |  |
| 52 | FOSFOMYCIN TROMETANOL (oral)       | 2000 mg     |  |
| 53 |                                    |             |  |
| 54 | GENTAMICIN                         | 240 mg      |  |
| 55 |                                    |             |  |
| 56 | IMIPENEM-CILASTATIN (IV)           | 500/500 mg  |  |
| 57 |                                    |             |  |
| 58 | LEVOFLOXACIN (IV)                  | 500 mg      |  |
| 59 |                                    |             |  |
| 60 |                                    |             |  |

|    |                                |             |  |
|----|--------------------------------|-------------|--|
| 1  |                                |             |  |
| 2  |                                |             |  |
| 3  | LEVOFLOXACIN (oral)            | 500 mg      |  |
| 4  | LINEZOLID (IV)                 | 600 mg      |  |
| 5  | LINEZOLID (oral)               | 600 mg      |  |
| 6  | MEROPENEM (IV)                 | 1000 mg     |  |
| 7  | METRONIDAZOLE (IV)             | 500 mg      |  |
| 8  | METRONIDAZOLE (oral)           | 250 mg      |  |
| 9  | NITROFURANTOIN (oral)          | 100         |  |
| 10 | PIPERACILLIN + TAZOBACTAM (IV) | 4000/500 mg |  |
| 11 | PIPERACILLIN + TAZOBACTAM (IV) | 3000/375 mg |  |
| 12 | TEICOPLANIN (IV)               | 400 mg      |  |
| 13 | TRIMETHOPRIM                   | 160 mg      |  |
| 14 | VANCOMYCIN (IV)                | 500 mg      |  |
| 15 | Name antibiotic 1              |             |  |
| 16 | Name antibiotic 2              |             |  |
| 17 | Name antibiotic 3              |             |  |
| 18 | Name antibiotic 4              |             |  |
| 19 | Name antibiotic 5              |             |  |
| 20 |                                |             |  |
| 21 |                                |             |  |
| 22 |                                |             |  |
| 23 |                                |             |  |
| 24 |                                |             |  |
| 25 |                                |             |  |
| 26 |                                |             |  |
| 27 |                                |             |  |
| 28 |                                |             |  |
| 29 |                                |             |  |
| 30 |                                |             |  |
| 31 |                                |             |  |
| 32 |                                |             |  |
| 33 |                                |             |  |
| 34 | 48                             |             |  |
| 35 | 49                             |             |  |
| 36 | 50                             |             |  |
| 37 | 51                             |             |  |
| 38 | 52                             |             |  |
| 39 | 53                             |             |  |
| 40 | 54                             |             |  |
| 41 | 55                             |             |  |
| 42 | 56                             |             |  |
| 43 | 57                             |             |  |
| 44 |                                |             |  |
| 45 |                                |             |  |
| 46 |                                |             |  |
| 47 |                                |             |  |
| 48 |                                |             |  |
| 49 |                                |             |  |
| 50 |                                |             |  |
| 51 |                                |             |  |
| 52 |                                |             |  |
| 53 |                                |             |  |
| 54 |                                |             |  |
| 55 |                                |             |  |
| 56 |                                |             |  |
| 57 |                                |             |  |
| 58 |                                |             |  |
| 59 |                                |             |  |
| 60 |                                |             |  |

Thank you for filling in this questionnaire.

For peer review only

1  
2  
3  
4  
5  
6  
7  
8  
9  
10  
11  
12  
13  
14  
15  
16  
17  
18  
19  
20  
21  
22  
23  
24  
25  
26  
27  
28  
29  
30  
31  
32  
33  
34  
35  
36  
37  
38  
39  
40  
41  
42  
43  
44  
45  
46  
47  
48  
49  
50  
51  
52  
53  
54  
55  
56  
57  
58  
59  
60

**STROBE 2007 (v4) Statement—Checklist of items that should be included in reports of *cohort studies***

| Section/Topic             | Item # | Recommendation                                                                                                                                                                       | Reported on page # |
|---------------------------|--------|--------------------------------------------------------------------------------------------------------------------------------------------------------------------------------------|--------------------|
| Title and abstract        | 1      | (a) Indicate the study’s design with a commonly used term in the title or the abstract                                                                                               | 1                  |
|                           |        | (b) Provide in the abstract an informative and balanced summary of what was done and what was found                                                                                  | 1-2                |
| <b>Introduction</b>       |        |                                                                                                                                                                                      |                    |
| Background/rationale      | 2      | Explain the scientific background and rationale for the investigation being reported                                                                                                 | 3                  |
| Objectives                | 3      | State specific objectives, including any prespecified hypotheses                                                                                                                     | 4                  |
| <b>Methods</b>            |        |                                                                                                                                                                                      |                    |
| Study design              | 4      | Present key elements of study design early in the paper                                                                                                                              | 4                  |
| Setting                   | 5      | Describe the setting, locations, and relevant dates, including periods of recruitment, exposure, follow-up, and data collection                                                      | 4-5                |
| Participants              | 6      | (a) Give the eligibility criteria, and the sources and methods of selection of participants. Describe methods of follow-up                                                           | 4-5                |
|                           |        | (b) For matched studies, give matching criteria and number of exposed and unexposed                                                                                                  | NA                 |
| Variables                 | 7      | Clearly define all outcomes, exposures, predictors, potential confounders, and effect modifiers. Give diagnostic criteria, if applicable                                             | 5-6                |
| Data sources/ measurement | 8*     | For each variable of interest, give sources of data and details of methods of assessment (measurement). Describe comparability of assessment methods if there is more than one group | 5                  |
| Bias                      | 9      | Describe any efforts to address potential sources of bias                                                                                                                            | 5                  |
| Study size                | 10     | Explain how the study size was arrived at                                                                                                                                            | 6                  |
| Quantitative variables    | 11     | Explain how quantitative variables were handled in the analyses. If applicable, describe which groupings were chosen and why                                                         | 6-7                |
| Statistical methods       | 12     | (a) Describe all statistical methods, including those used to control for confounding                                                                                                | 8                  |
|                           |        | (b) Describe any methods used to examine subgroups and interactions                                                                                                                  | NA                 |
|                           |        | (c) Explain how missing data were addressed                                                                                                                                          | 9                  |
|                           |        | (d) If applicable, explain how loss to follow-up was addressed                                                                                                                       | NA                 |
|                           |        | (e) Describe any sensitivity analyses                                                                                                                                                | NA                 |
| <b>Results</b>            |        |                                                                                                                                                                                      |                    |

|                          |     |                                                                                                                                                                                                              |           |
|--------------------------|-----|--------------------------------------------------------------------------------------------------------------------------------------------------------------------------------------------------------------|-----------|
| Participants             | 13* | (a) Report numbers of individuals at each stage of study—eg numbers potentially eligible, examined for eligibility, confirmed eligible, included in the study, completing follow-up, and analysed            | 9; 19     |
|                          |     | (b) Give reasons for non-participation at each stage                                                                                                                                                         | 9; 19     |
|                          |     | (c) Consider use of a flow diagram                                                                                                                                                                           | NA        |
| Descriptive data         | 14* | (a) Give characteristics of study participants (eg demographic, clinical, social) and information on exposures and potential confounders                                                                     | 9; 19     |
|                          |     | (b) Indicate number of participants with missing data for each variable of interest                                                                                                                          | 9; 19     |
|                          |     | (c) Summarise follow-up time (eg, average and total amount)                                                                                                                                                  | NA        |
| Outcome data             | 15* | Report numbers of outcome events or summary measures over time                                                                                                                                               | 9-10; 20  |
| Main results             | 16  | (a) Give unadjusted estimates and, if applicable, confounder-adjusted estimates and their precision (eg, 95% confidence interval). Make clear which confounders were adjusted for and why they were included | 10-11; 20 |
|                          |     | (b) Report category boundaries when continuous variables were categorized                                                                                                                                    | 20-21     |
|                          |     | (c) If relevant, consider translating estimates of relative risk into absolute risk for a meaningful time period                                                                                             | NA        |
| Other analyses           | 17  | Report other analyses done—eg analyses of subgroups and interactions, and sensitivity analyses                                                                                                               | NA        |
| <b>Discussion</b>        |     |                                                                                                                                                                                                              |           |
| Key results              | 18  | Summarise key results with reference to study objectives                                                                                                                                                     | 11-12     |
| <b>Limitations</b>       |     |                                                                                                                                                                                                              |           |
| Interpretation           | 20  | Give a cautious overall interpretation of results considering objectives, limitations, multiplicity of analyses, results from similar studies, and other relevant evidence                                   | 11-13     |
| Generalisability         | 21  | Discuss the generalisability (external validity) of the study results                                                                                                                                        | 12-13     |
| <b>Other information</b> |     |                                                                                                                                                                                                              |           |
| Funding                  | 22  | Give the source of funding and the role of the funders for the present study and, if applicable, for the original study on which the present article is based                                                | 14        |

\*Give information separately for cases and controls in case-control studies and, if applicable, for exposed and unexposed groups in cohort and cross-sectional studies.

**Note:** An Explanation and Elaboration article discusses each checklist item and gives methodological background and published examples of transparent reporting. The STROBE checklist is best used in conjunction with this article (freely available on the Web sites of PLoS Medicine at <http://www.plosmedicine.org/>, Annals of Internal Medicine at <http://www.annals.org/>, and Epidemiology at <http://www.epidem.com/>). Information on the STROBE Initiative is available at [www.strobe-statement.org](http://www.strobe-statement.org).



# BMJ Open

## The cost of hospitalised patients due to complicated urinary tract infections – A retrospective observational study in countries with high prevalence of multidrug resistant Gram-negative bacteria: the COMBACTE-MAGNET, RESCUING study

|                                 |                                                                                                                                                                                                                                                                                                                                                                                                                                                                                                                                                                                                                                                                                                                                                                                                                                                                                                                                                                                                                                                                                                                                                                                                                                                                                                                                                                                                                                                                                                                                                                             |
|---------------------------------|-----------------------------------------------------------------------------------------------------------------------------------------------------------------------------------------------------------------------------------------------------------------------------------------------------------------------------------------------------------------------------------------------------------------------------------------------------------------------------------------------------------------------------------------------------------------------------------------------------------------------------------------------------------------------------------------------------------------------------------------------------------------------------------------------------------------------------------------------------------------------------------------------------------------------------------------------------------------------------------------------------------------------------------------------------------------------------------------------------------------------------------------------------------------------------------------------------------------------------------------------------------------------------------------------------------------------------------------------------------------------------------------------------------------------------------------------------------------------------------------------------------------------------------------------------------------------------|
| Journal:                        | <i>BMJ Open</i>                                                                                                                                                                                                                                                                                                                                                                                                                                                                                                                                                                                                                                                                                                                                                                                                                                                                                                                                                                                                                                                                                                                                                                                                                                                                                                                                                                                                                                                                                                                                                             |
| Manuscript ID                   | bmjopen-2017-020251.R1                                                                                                                                                                                                                                                                                                                                                                                                                                                                                                                                                                                                                                                                                                                                                                                                                                                                                                                                                                                                                                                                                                                                                                                                                                                                                                                                                                                                                                                                                                                                                      |
| Article Type:                   | Research                                                                                                                                                                                                                                                                                                                                                                                                                                                                                                                                                                                                                                                                                                                                                                                                                                                                                                                                                                                                                                                                                                                                                                                                                                                                                                                                                                                                                                                                                                                                                                    |
| Date Submitted by the Author:   | 07-Dec-2017                                                                                                                                                                                                                                                                                                                                                                                                                                                                                                                                                                                                                                                                                                                                                                                                                                                                                                                                                                                                                                                                                                                                                                                                                                                                                                                                                                                                                                                                                                                                                                 |
| Complete List of Authors:       | <p>Vallejo Torres, Laura; University College London, Department of Applied Health Research; Universidad de Las Palmas de Gran Canaria, Departamento de Métodos Cuantitativos en Economía y Gestión Pujol, Miquel; Hospital Universitari de Bellvitge. IDIBELL, Infectious Diseases; Spanish Network for the Research in Infectious Diseases (REIPI RD12/0015), Instituto de Salud Carlos III</p> <p>Shaw, Evelyn; Hospital Universitari de Bellvitge. IDIBELL, Infectious Diseases; Spanish Network for the Research in Infectious Diseases (REIPI RD12/0015), Instituto de Salud Carlos III</p> <p>Wiegand, Irith; AiCuris Anti-infective Cures GmbH, Vigo, Joan Miquel; Fundació Institut Català de Farmacologia, Informatics Unit</p> <p>Stoddart, Margaret; Southmead Hospital</p> <p>Grier, Sally; Southmead Hospital</p> <p>Gibbs, Julie; Southmead Hospital</p> <p>Vank, Christiane; AiCuris Anti-infective Cures GmbH</p> <p>Cuperus, Nienke ; University Medical Center Utrecht</p> <p>van den Heuvel, Leo; University Medical Center Utrecht</p> <p>Eliakim-Raz, Noa; Rabin Medical Center</p> <p>Carratala, Jordi; Hospital Universitari de Bellvitge, Infectious Diseases</p> <p>Vuong, Cuong; AiCuris Anti-infective Cures GmbH</p> <p>MacGowan, Alasdair; Southmead Hospital</p> <p>Babich, Tanya; Rabin Medical Center, Beilinson Hospital</p> <p>Leibovici, Leonard; Tel Aviv University, Medicine E</p> <p>Addy, Ibrionke; AiCuris Anti-infective Cures GmbH,</p> <p>Morris, Stephen; University College London, Department of Applied Health Research</p> |
| <b>Primary Subject Heading</b>: | Urology                                                                                                                                                                                                                                                                                                                                                                                                                                                                                                                                                                                                                                                                                                                                                                                                                                                                                                                                                                                                                                                                                                                                                                                                                                                                                                                                                                                                                                                                                                                                                                     |
| Secondary Subject Heading:      | Health economics                                                                                                                                                                                                                                                                                                                                                                                                                                                                                                                                                                                                                                                                                                                                                                                                                                                                                                                                                                                                                                                                                                                                                                                                                                                                                                                                                                                                                                                                                                                                                            |
| Keywords:                       | Urinary tract infections < UROLOGY, cost of illness, Health economics < HEALTH SERVICES ADMINISTRATION & MANAGEMENT                                                                                                                                                                                                                                                                                                                                                                                                                                                                                                                                                                                                                                                                                                                                                                                                                                                                                                                                                                                                                                                                                                                                                                                                                                                                                                                                                                                                                                                         |
|                                 |                                                                                                                                                                                                                                                                                                                                                                                                                                                                                                                                                                                                                                                                                                                                                                                                                                                                                                                                                                                                                                                                                                                                                                                                                                                                                                                                                                                                                                                                                                                                                                             |

1  
2  
3  
4  
5  
6  
7  
8  
9  
10  
11  
12  
13  
14  
15  
16  
17  
18  
19  
20  
21  
22  
23  
24  
25  
26  
27  
28  
29  
30  
31  
32  
33  
34  
35  
36  
37  
38  
39  
40  
41  
42  
43  
44  
45  
46  
47  
48  
49  
50  
51  
52  
53  
54  
55  
56  
57  
58  
59  
60

SCHOLARONE™  
Manuscripts

For peer review only

1  
2  
3 **Title:** The cost of hospitalised patients due to complicated urinary tract infections – A  
4 retrospective observational study in countries with high prevalence of multidrug  
5 resistant Gram-negative bacteria: the COMBACTE-MAGNET, RESCUING study  
6  
7  
8  
9  
10

11  
12 **Authors:**  
13

14  
15 Laura Vallejo-Torres<sup>1,2\*</sup>, Miquel Pujol<sup>3,4</sup>, Evelyn Shaw<sup>3,4</sup>, Irith Wiegand<sup>5</sup>, Joan Miquel  
16 Vigo<sup>6</sup>, Margaret Stoddart<sup>7</sup>, Sally Grier<sup>7</sup>, Julie Gibbs<sup>7</sup>, Christiane Vank<sup>5</sup>, Nienke  
17 Cuperus<sup>8</sup>, Leo van den Heuvel<sup>8</sup>, Noa Eliakim-Raz<sup>9</sup>, Jordi Carratala<sup>3,4</sup>, Cuong Vuong<sup>5</sup>,  
18 Alasdair MacGowan<sup>7</sup>, Tanya Babich<sup>9</sup>, Leonard Leibovici<sup>9</sup>, Ibronke Addy<sup>5</sup>, Stephen  
19 Morris<sup>1</sup>, on behalf of RESCUING Study Group and Study Sites<sup>^</sup>  
20  
21  
22  
23  
24  
25  
26  
27

28 <sup>1</sup>UCL Department of Applied Health Research. University College London, London, UK  
29

30  
31 <sup>2</sup>Departamento de Métodos Cuantitativos en Economía y Gestión. Universidad de Las  
32 Palmas de Gran Canaria, Las Palmas de Gran Canaria, Spain  
33  
34

35  
36 <sup>3</sup>Infectious diseases Department. Hospital Universitari de Bellvitge-IDIBELL, Barcelona,  
37 Spain  
38  
39

40  
41 <sup>4</sup>Spanish Network for the Research in Infectious Diseases (REIPI RD12/0015), Instituto  
42 de Salud Carlos III, Madrid, Spain  
43  
44

45 <sup>5</sup>AiCuris Anti-infective Cures GmbH, Wuppertal, Germany.  
46  
47

48 <sup>6</sup>Informatics Unit, Fundació Institut Català de Farmacologia, Barcelona, Spain  
49

50  
51 <sup>7</sup>Department of Medical Microbiology, Southmead Hospital, North Bristol NHS Trust,  
52 Bristol, UK  
53  
54  
55  
56  
57

1  
2  
3 <sup>8</sup>Julius Center for Health Sciences and Primary Care, University Medical Center  
4 Utrecht, Utrecht, Netherlands.

5  
6  
7 <sup>9</sup>Department of Medicine E, Beilinson Hospital, Rabin Medical Center, Petah-Tiqva,  
8 Israel Sackler Faculty of Medicine, Tel-Aviv University, Petah Tikva, Israel.

9  
10  
11  
12 <sup>^</sup>Membership of the RESCUING Study Group and Study Sites is provided in the  
13 Acknowledgments.

14  
15  
16  
17  
18  
19 **\*Corresponding author**

20  
21 Laura Vallejo Torres

22  
23 Postal address: UCL Department of Applied Health Research. University College  
24 London, Gower Street, London WC1E 6BT, UK

25  
26 Telephone: +34 928 458 228

27  
28 Email: [laura.vallejotorres@sescs.es](mailto:laura.vallejotorres@sescs.es)

29  
30 Fax: NA

31  
32  
33 **Keywords:**

34  
35 Urinary tract infections; health economics; cost of illness

36  
37  
38  
39 **Word count:** 3954

## Abstract

*Objective:* Complicated urinary tract infections (cUTI) impose a high burden on healthcare systems and are a frequent cause of hospitalisation. The aims of this paper are to estimate the cost per episode of patients hospitalised due to cUTI and to explore the factors associated with cUTI-related healthcare costs in eight countries with high prevalence of multidrug resistance (MDR).

*Design:* This is a multinational observational, retrospective study. The mean cost per episode was computed by multiplying the volume of healthcare use for each patient by the unit cost of each item of care, and summing across all components. Costs were measured from the hospital perspective. Patient-level regression analyses were used to identify the factors explaining variation in cUTI-related costs.

*Setting:* The study was conducted in 20 hospitals in 8 countries with high prevalence of multidrug resistant Gram-negative bacteria (Bulgaria, Greece, Hungary, Israel, Italy, Romania, Spain and Turkey).

*Participants:* Data were obtained from 644 episodes of patients hospitalised due to cUTI.

*Results:* The mean cost per case was 5,700€, with considerable variation between countries (largest value 7,740€ in Turkey; lowest value 4,028€ in Israel), mainly due to differences in length of hospital stay. Factors associated with higher costs per patient were: type of admission, infection source, infection severity, the Charlson comorbidity index and presence of MDR.

*Conclusions:* The mean cost per hospitalised case of cUTI was substantial and varied significantly between countries. A better knowledge of the reasons for variations in length of stays could facilitate a better standardised quality of care for patients with cUTI and allow a more efficient allocation of healthcare resources. Urgent admissions,

1  
2  
3 infections due to an indwelling urinary catheterisation, resulting in septic shock or  
4 severe sepsis, in patients with comorbidities and presenting MDR were related to a  
5 higher cost.  
6  
7  
8  
9  
10  
11

## 12 **Strengths and limitations of the study**

- 15 • This is the first study to examine costs of hospitalised patients due to cUTI from  
16 a multinational point of view.
- 17 • It is focused on countries with a high prevalence of MDR bacteria where cUTI  
18 impose a significant burden.
- 19 • The study estimates the mean cost per case from a bottom-up perspective,  
20 which provided a high level of granularity and the basis for the assessment of  
21 sources of variation and drivers of healthcare costs.
- 22 • The design of the study did not include a control group to assess the extra  
23 length of stay and excess costs of patients who are admitted to hospital due to  
24 a different condition and develop UTI during their hospitalisation.
- 25 • Country-specific unit cost data was not appropriate for most countries and  
26 therefore we applied the same set of unit costs, as estimated in one country,  
27 Spain, to the rest of the countries.  
28  
29  
30  
31  
32  
33  
34  
35  
36  
37  
38  
39  
40  
41  
42  
43

## 44 **INTRODUCTION**

45  
46 Urinary tract infections (UTIs) are highly prevalent worldwide. UTIs that occur in a  
47 normal genitourinary tract with no prior instrumentation are considered uncomplicated,  
48 whereas complicated UTIs (cUTIs) are associated with structural or functional  
49 abnormalities of the genitourinary tract or an underlying disease that interferes with  
50 host defence [1]. cUTIs are a frequent cause of hospitalisation as well as a common  
51  
52  
53  
54  
55  
56  
57  
58  
59  
60

1  
2  
3 complication during hospitalisation and have shown a higher prevalence of  
4 antimicrobial resistance compared to uncomplicated UTI [2]. Due to the rapid  
5 emergence and dissemination of resistance to antimicrobial agents, leading in some  
6 cases to multidrug resistance (MDR), some patients with cUTI are left with few  
7 therapeutic options and may progress to more serious stages of the disease [3].  
8  
9

10  
11  
12  
13 Currently, information about the burden of cUTI is scarce. Reports from the USA show  
14 that in the year 2000 cUTI accounted for more than 100,000 hospital admissions, often  
15 as a result of pyelonephritis [4]. Data from Europe are very limited, although the last  
16 point prevalence survey of European acute care hospitals estimated the prevalence of  
17 healthcare-associated infections (HAIs) to be 6%; of these, UTI was the third most  
18 common infection (19%) [5]. Based on these point prevalence data, the annual health  
19 burden of hospitalised UTI patients was estimated to be 81.2 disability-adjusted life  
20 years (DALYs) per 100,000 individuals in the general population [6].  
21  
22  
23  
24  
25  
26  
27  
28  
29

30  
31 Despite this high burden to healthcare systems and the increased pressure for cost  
32 containment in healthcare, few studies have examined the costs of cUTIs. Some  
33 papers have measured the cost of community-acquired UTIs [7, 8, 9, 10] and  
34 nosocomial UTIs [11, 12], or both [13]. Most of these studies were conducted in the  
35 USA [7, 8, 11, 12, 13], while studies undertaken in European countries have mainly  
36 focused on women visiting primary care settings with suspected UTIs [9, 10]. Some  
37 papers have estimated the impact of extended-spectrum beta-lactamase (ESBL)-  
38 producing *Escherichia coli* (*E. coli*) on the cost of UTI episodes requiring hospitalisation  
39 [14, 15]. Estimating the magnitude of the financial impact of this prevalent and  
40 potentially avoidable condition is particularly useful for measuring the potential cost  
41 savings from averting a case, thereby emphasising the importance of prevention and  
42 the sizeable economic consequences of MDR. In addition, cost estimates might inform  
43 cost-effectiveness analyses that require data on episode costs in order to compare  
44 alternative courses of treatment related to this condition. Therefore, there is a need for  
45  
46  
47  
48  
49  
50  
51  
52  
53  
54  
55  
56  
57  
58  
59  
60

1  
2  
3 data on the economic burden imposed to healthcare systems due to hospitalised cUTI  
4 patients, especially in countries with high prevalence of MDR.  
5  
6

7 In this paper we present an analysis of the economic burden of cUTI in seven  
8 European countries plus Israel, all of which have a high prevalence of MDR. The aims  
9 of this study are to estimate the cost per case of hospitalised patients due to cUTI and  
10 to investigate the factors associated with cUTI-related health care costs.  
11  
12  
13  
14  
15

16 The analyses reported in this paper are part of a larger project, “REtrospective  
17 observational Study to assess the clinical management and outcomes of hospitalised  
18 patients with Complicated Urinary tract INfection in countries with high prevalence of  
19 multidrug resistant Gram-negative bacteria (RESCUING study)”, with an overall aim of  
20 providing information about the epidemiology, clinical management, outcomes and  
21 healthcare costs of patients hospitalised with cUTI.  
22  
23  
24  
25  
26  
27  
28

## 29 **MATERIALS AND METHODS**

### 30 **Setting**

31  
32  
33  
34 This is a multinational observational, retrospective study conducted in 20 hospitals in 8  
35 countries (Bulgaria, Greece, Hungary, Israel, Italy, Romania, Spain and Turkey). Data  
36 were collected on patients who had a diagnosis of cUTI as the primary cause of  
37 hospitalisation and patients hospitalised for another reason but who developed cUTI  
38 during their hospitalisation from January 2013 to December 2014, based on ICD-9 and  
39 ICD-10 codes (ICD-9 CM Codes: 590.1, 590.10, 590.11, 590.2, 590.8, 590.80, 590.9,  
40 595.0, 595.89, 595.9, 599.0; ICD-10 CM Codes: N10, N12, N13.6, N15.1, N15.9,  
41 N30.0, N30.8, N30.9, N39.0). The study protocol has been published elsewhere [16].  
42  
43  
44  
45  
46  
47  
48  
49  
50

51 In order to avoid selection bias, all consecutive patients who had ICD-9 or ICD-10 CM  
52 codes were reviewed at each site. All patients who met the inclusion criteria were  
53 selected for data collection. Inclusion criteria were patients with UTI **and** at least one of  
54  
55  
56  
57  
58  
59  
60



1  
2  
3 the following: indwelling urinary catheter, urinary retention, neurogenic bladder,  
4 obstructive uropathy, renal impairment caused by intrinsic renal disease, renal  
5 transplantation, urinary tract modifications, pyelonephritis and normal urinary tract  
6 anatomy; **and** at least one of the following signs or symptoms: chills or rigors  
7 associated with fever or hypothermia, flank pain (pyelonephritis) or pelvic pain (cUTI),  
8 dysuria or urinary frequency, or urinary urgency, costo-vertebral angle tenderness on  
9 physical examination and either urine culture with at least 10<sup>5</sup> CFU/mL or greater of a  
10 uropathogen (no more than 2 species) or at least one blood culture growing possible  
11 uropathogens (no more than 2 species) with no other evident site of infection. These  
12 inclusion criteria are in accordance to the definition of cUTI provided in [17]. The  
13 analysis presented in this paper focuses on patients admitted to hospital because of  
14 cUTI only; we do not include patients admitted for other reasons who developed cUTI  
15 during hospitalisation. The reason is that in the case of latter it is not possible to isolate  
16 the incremental cost of cUTI without a matched control group, i.e., comparing similar  
17 patients with and without cUTI during their hospital stay (see e.g. [18]). Our data  
18 indicates that the proportion of cUTI that are the cause of hospital admission is 65%  
19 versus a 35% that develop cUTI during hospitalisation.

### 36 37 **Study data collection**

38  
39  
40 Data were collected retrospectively for all cUTI episodes at participating hospitals  
41 during the study period. Local ethical approval was obtained from each site. For all  
42 patients, a standardised set of information was recorded. This consisted of  
43 demographics, comorbidities including those required to calculate a modified Charlson  
44 score [19], place of acquisition of infection, infection source and severity,  
45 microbiological data, imaging test data, infection management, antibiotic therapy,  
46 outcomes, details of discharge and readmissions. The follow-up period was 2 months  
47 after discharge from the admitting hospital.

1  
2  
3 The perspective of the cost analysis was the hospital provider, as we focus on  
4 hospitalised cUTI patients and this is where the majority of the cost burden falls [20,  
5 21].  
6  
7

8  
9 Study size was defined based on the primary outcome measure of the main study, i.e.  
10 treatment failure rate between MDR bacteria and other pathogens [16].  
11  
12

### 13 14 **Estimating the cost per case of cUTI**

15

16  
17 We collected information on healthcare resource utilisation attributed to cUTI for each  
18 episode in the dataset. The healthcare components collected were: *i*) length of hospital  
19 stay (LOS) (general ward, ICU), *ii*) diagnostic and follow up tests, *iii*) urological  
20 interventions and haemodialysis, *iv*) antibiotic treatment before, during and after  
21 hospitalisation, and *v*) hospital readmissions and outpatient visits within 60 days of  
22 discharge. For each component, a comprehensive list of specific items was compiled  
23 and reviewed by a clinical expert so that it included only healthcare resources that  
24 could be attributed to cUTI.  
25  
26  
27  
28  
29  
30  
31  
32

33  
34 For unit costs, we planned to use the tool developed by WHO-CHOICE health service  
35 delivery costs [22], which provides information on the unit costs of bed-days and  
36 outpatient visits across 191 countries. Unfortunately, unit costs from this tool are only  
37 available for inpatient and outpatient visits, and for 2007-08, and therefore they could  
38 not be used in our study. Instead, unit cost data for each cost item were collected for  
39 each country by means of a questionnaire sent to the principal investigators of all  
40 participating sites. The questionnaire was provided as an online and paper version, and  
41 included the list of all healthcare services identified for the management of cUTI (see  
42 Supplementary material 1). The response rate for the questionnaire was 90% (18 out of  
43 20). We received at least one response from each country. However, despite efforts to  
44 facilitate the complete fulfilment and harmonisation of the questionnaires, responses  
45 from some of the sites had missing values for key healthcare costs items, such as the  
46  
47  
48  
49  
50  
51  
52  
53  
54  
55  
56  
57  
58  
59  
60

1  
2  
3 cost of a day in hospital and for the most frequent diagnostic tests and treatment  
4 procedures. Furthermore, some sites provided the data in terms of user charges  
5 instead of the cost incurred by the hospital in the provision of the services. As a result,  
6 we observed a large degree of variation in unit costs across sites that was not  
7 attributable only to differences in actual costs between regions. Therefore, we  
8 generated a single set of unit costs based on the mean values across three sites within  
9 the same country, Spain, which provided consistently estimated values reflecting  
10 hospital costs for all the items included in the questionnaire. Using a common set of  
11 unit costs across all patients means that any observed variation in costs is due to  
12 differences in healthcare resource use. We discuss the limitations of this approach in  
13 the discussion section.  
14  
15  
16  
17  
18  
19  
20  
21  
22  
23

24  
25 For antibiotic therapy we estimated the cost per mg for each drug for which unit cost  
26 data was available, and applied the mean cost per mg to the remaining therapies. We  
27 estimated the cost per day with antibiotic therapy based on the dosage and frequency  
28 recorded for each drug, which was then combined with the duration of the treatment to  
29 estimate total antibiotic therapy costs. Patients might receive more than one antibiotic  
30 drug at the same time; in that case they count as separate antibiotic therapy days.  
31 Patients with total hospital LOS >200 days were excluded (3 observations) as these  
32 were deemed to be due to coding errors.  
33  
34  
35  
36  
37  
38  
39  
40

41  
42 We computed means and standard deviations as well as medians and interquartile  
43 ranges for the cost per case, and we quantified the contribution of each cost item and  
44 overall healthcare component to the total cost per case. We also present variations in  
45 the overall cost per case by country and for different cost components. All costs were  
46 reported in 2016 euros.  
47  
48  
49  
50

51  
52 Costs were calculated for each case of cUTI requiring a hospital admission. If a patient  
53 required a second hospital admission, then if this occurred within 60 days of discharge  
54  
55  
56  
57

of the first admission it was counted as a readmission and included in the cost of the first admission. If another admission occurred after 60 days post discharge (either of the index admission or a readmission) then this was counted as a separate case (observation) in the data.

### **Factors associated with cUTI-related healthcare costs**

The analysis of the factors associated with cUTI-related healthcare costs was undertaken using multivariate regression analysis using patient level cost data. The dependent variable was total cost per patient estimated as described above.

The explanatory variables were demographic factors (age and gender), comorbidities measured by the Charlson morbidity index [18], admission characteristics (urgent versus elective; and admitted from home versus from another facility), infection severity (defined as septic shock or severe sepsis), MDR profile (defined as non-susceptibility to at least one agent in three or more antimicrobial categories [23]), episode number and 30-day mortality. We categorised the source of infection using the following definitions: i) UTI related to indwelling urinary catheterisation including long-term, short-term or intermittent catheterisation; ii) pyelonephritis, consisting of inflammation of the kidney tissue caused by bacterial infection in patients that have no other urinary tract modification; and iii) other sources, which includes UTI related to anatomical urinary tract modification, UTI related to obstructive uropathy and UTI related to other events that do not fulfil any other category. We ran three sets of models: i) univariate regression models for each variable separately, ii) a multivariate model including all the covariates, and iii) a reduced multivariate model including only significant variables (where in the case of categorical variables, at least one indicator was non-significant).

Analyses were undertaken using Stata version 12. More details about the statistical methods used in the analyses are reported in the Supplementary material 2.

## **RESULTS**

## Study population characteristics

Data was collected on 653 cUTI episodes in 637 patients (mean number of episodes per patient, 1.04). There were missing data on LOS for nine episodes, so mean costs per case were computed for 644 cases. Most common causative pathogens in this sample were *Escherichia coli* (58%), *Klebsiella sp* (14%), *Proteus mirabilis* (7%), *Pseudomonas aeruginosa* (6%) and *Enterococcus sp* (5%). This is consistent with previous studies that have found *E. coli* to be the most commonly isolated organism, especially in cUTI acquired at the community [24] which were the majority in our sample (69% versus 31% associated to health care facilities).

Fifty seven percent of the cohort were females and the mean age was 65.7 years (Table 1). Mean Charlson comorbidity score was 2.4. Ninety one percent of admissions were urgent (as opposed to elective) and 85% of the patients were admitted from home (as opposed from another facility). The infection source was indwelling urinary catheterisation in 20% of cases, pyelonephritis in 27% of cases, and other sources (including anatomical urinary tract modification and obstructive uropathy) in the remaining 53%. Twenty six percent of the episodes were caused by MDR bacteria. The severity of the infection was categorised as severe sepsis or septic shock in 16% of cases. Five percent of the sample died within 30 days of discharge. The proportion of cases collected by each country ranged from 5% in Bulgaria to 26% in Israel.

**Table 1. Summary statistics of cohort characteristics and regression analysis results of total cost per cUTI episode**

|                          | N (%)<br>Mean<br>(SD) <sup>a</sup> | Univariate<br>analysis <sup>b</sup><br>[95% CI] | Multivariate<br>analysis -<br>Full model <sup>c</sup><br>[95% CI] | Multivariate<br>analysis -<br>Reduced model <sup>d</sup><br>[95% CI] |
|--------------------------|------------------------------------|-------------------------------------------------|-------------------------------------------------------------------|----------------------------------------------------------------------|
| <b>Demographics</b>      |                                    |                                                 |                                                                   |                                                                      |
| Age                      | 65.7<br>(18.66) <sup>a</sup>       | 19.77<br>[-7.5; 47]                             | 11.76<br>[-3.5; 27]                                               |                                                                      |
| Female                   | 371<br>(58%)                       | -796.06<br>[-1872.5; 280.4]                     | 17.59<br>[-582.8; 618]                                            |                                                                      |
| <b>Type of admission</b> |                                    |                                                 |                                                                   |                                                                      |
| Urgent (vs. Elective)    | 585                                | 458.91                                          | 937.87**                                                          | 991.32**                                                             |

|                                               |                     |                    |                    |                    |
|-----------------------------------------------|---------------------|--------------------|--------------------|--------------------|
|                                               | (91%)               | [-775.4; 1693.2]   | [44.8; 1830.9]     | [84.6; 1898]       |
| From home (vs. Other facility)                | 549                 | -677.89            | -577.62            |                    |
|                                               | (85%)               | [-2429.6; 1073.8]  | [-1672.4; 517.1]   |                    |
| <b>Infection source (vs. catheterisation)</b> |                     |                    |                    |                    |
| Pyelonephritis                                | 171                 | -1,673.18***       | -1,802.63***       | -1,891.57***       |
|                                               | (27%)               | [-2819.3; -527]    | [-2812.8; -792.4]  | [-2864.4; -918.7]  |
| Other source                                  | 344                 | -821.88            | -709.83            | -760.95*           |
|                                               | (53%)               | [-1946.1; 302.3]   | [-1672.3; 252.6]   | [-1690.3; 168.4]   |
| <b>Infection severity (vs. other)</b>         |                     |                    |                    |                    |
| Septic shock/severe sepsis                    | 100                 | 2,415.49***        | 1,671.77***        | 1,587.57**         |
|                                               | (16%)               | [1050.8; 3780.2]   | [437.9; 2905.6]    | [280.7; 2894.5]    |
| <b>Charlson Comorbidity Index</b>             | 2.4                 | 324.34***          | 230.85**           | 263.48***          |
|                                               | (2.39) <sup>a</sup> | [116.8; 531.9]     | [28.1; 433.6]      | [53.9; 473.1]      |
| <b>Episode number</b>                         | 1.04                | 1,394.33***        | 355.91             |                    |
|                                               | (0.24) <sup>a</sup> | [363.8; 2424.8]    | [-522; 1233.9]     |                    |
| <b>Mortality 30 days (yes vs. no)</b>         | 29                  | 571.66             | -934.75            |                    |
|                                               | (5%)                | [-2511.2; 3654.5]  | [-3510.7; 1641.2]  |                    |
| <b>Multidrug resistant (yes vs. no)</b>       | 166                 | 626.99             | 475.92             | 581.41*            |
|                                               | (26%)               | [-421.5; 1675.5]   | [-221.6; 1173.4]   | [-98; 1260.8]      |
| <b>Country (vs. Turkey)</b>                   |                     |                    |                    |                    |
| Greece                                        | 65                  | -597.99            | -1,503.81          | -1,263.11          |
|                                               | (10%)               | [-2692.5; 1496.5]  | [-3933.1; 925.5]   | [-3782.8; 1256.6]  |
| Hungary                                       | 49                  | -1,734.5**         | -2,757.06***       | -2,768.68***       |
|                                               | (8%)                | [-3216.4; -252.6]  | [-4101.8; -1412.3] | [-4278.8; -1258.5] |
| Israel                                        | 170                 | -3,612.37***       | -4,242.55***       | -4,007.09***       |
|                                               | (26%)               | [-4659.1; -2565.7] | [-5395.7; -3089.4] | [-5426.5; -2587.7] |
| Italy                                         | 36                  | -319.91            | -1,065.03*         | -930.92            |
|                                               | (6%)                | [-1648.8; 1008.9]  | [-2358.1; 228]     | [-2501; 639.2]     |
| Romania                                       | 107                 | -2,389.75***       | -2,024.15***       | -1,931.49***       |
|                                               | (17%)               | [-3438.9; -1340.6] | [-3149.8; -898.5]  | [-3301.5; -561.5]  |
| Spain                                         | 126                 | -819.22            | -1,629.41***       | -1,422.96**        |
|                                               | (20%)               | [-1942.5; 304.1]   | [-2756.9; -501.9]  | [-2812.8; -33.1]   |
| Bulgaria                                      | 31                  | -2,520.07***       | -2,853.38***       | -2,841.09***       |
|                                               | (5%)                | [-4454.5; -585.6]  | [-4068.1; -1638.7] | [-4354.9; -1327.2] |
| Pseudo-R <sup>2</sup>                         | N/A                 | N/A                | 0.111              | 0.105              |
| <b>Sample size<sup>b</sup></b>                | 644                 |                    | 636 <sup>e</sup>   |                    |

Note: SD = Standard deviation; CI = Confidence Interval; N/A = Not Applicable

\*p<0.1.\*\*p<0.05.\*\*\*p<0.01.

aSummary statistics for continuous variables are shown as mean and standard deviations; for categorical variables we present total number of observations and percentage.

bMarginal effects of univariate regression models for each variable separately.

cMarginal effects of a multivariate model including all the covariates.

dMarginal effect of a reduced multivariate model including only significant variables.

eThere are 8 cases with missing data on mortality at 30 days. Therefore, the sample used in the regression analyses includes 636 cases out of the 644 cases for whom data on cost per case was available.

## Estimating the cost per case of cUTI

Table 2 presents unit costs, resource use and total costs separately for each healthcare item as well as for each set of overall cost components. The mean (median) length of stay in hospital was 9 (7) days, and a small proportion of the total stay was in the ICU. Most patients had urine cultures, urinary sediment analyses and blood cultures undertaken, while imaging tests were rarely performed. The urological intervention most often performed was the insertion of an indwelling bladder-catheter. The mean number of antibiotic therapy days before, during and after hospitalisation were 2, 12 and 6 days, respectively. Nearly 10% of patients were readmitted to hospital due to a cUTI recurrence, with a mean readmission stay across the full sample of 1 day (11 days among the subsample of readmitted patients). The mean number of outpatient visits per patient within 60 days of hospital discharge was 0.8.

**Table 2. Cost per case by cost component – all countries combined**

|                               | Unit cost (€) | Resource use (units) |                | Total cost (€)   |                     | %     |
|-------------------------------|---------------|----------------------|----------------|------------------|---------------------|-------|
|                               |               | Mean (SD)            | Median [Q1-Q3] | Mean (SD)        | Median [Q1-Q3]      |       |
| <b>Length of stay</b>         |               |                      |                |                  |                     |       |
| General ward (days)           | 477.4         | 9.25 (8.49)          | 7 [5-11]       | 4,418.5 (4052.4) | 3,342 [2,387-5,252] | 77.4% |
| ICU (days)                    | 1,589.6       | 0.05 (1.19)          | 0 [0-0]        | 83.9 (1895.4)    | 0 [0-0]             | 1.5%  |
|                               |               | 9.30 (8.51)          | 7 [5-11]       | 4,502.4 (4389.9) | 3,342 [2,387-5,252] | 78.9% |
| <b>Diagnostic tests</b>       |               |                      |                |                  |                     |       |
| Urine culture test            | 15.1          | 1.51 (0.82)          | 1 [1-2]        | 22.8 (12.5)      | 15 [15-30]          | 0.4%  |
| Dipstick analysis             | 2.8           | 0.49 (0.85)          | 0 [0-1]        | 1.3 (2.3)        | 0 [0-3]             | 0.0%  |
| Urinary sediment analysis     | 2.6           | 1.02 (0.89)          | 1 [0-1]        | 2.6 (2.3)        | 3 [0-3]             | 0.0%  |
| Gram stain test               | 6.3           | 0.37 (0.68)          | 0 [0-1]        | 2.3 (4.2)        | 0 [0-6]             | 0.0%  |
| Blood culture                 | 36.7          | 1.43 (1.56)          | 1 [0-2]        | 52.5 (57.1)      | 37 [0-73]           | 0.9%  |
| Abdominal Ultrasonography     | 48.9          | 0.71 (0.64)          | 1 [0-1]        | 34.5 (31.3)      | 49 [0-49]           | 0.6%  |
| CT Scan                       | 156.0         | 0.2 (0.46)           | 0 [0-0]        | 32 (72.5)        | 0 [0-0]             | 0.6%  |
| Pyelography                   | 105.1         | 0.02 (0.14)          | 0 [0-0]        | 2 (14.2)         | 0 [0-0]             | 0.0%  |
| MRI scan                      | 191.6         | 0 (0.07)             | 0 [0-0]        | 0.9 (13.1)       | 0 [0-0]             | 0.0%  |
|                               |               |                      |                | 151 (109)        | 115 [75-201]        | 2.6%  |
| <b>Treatment procedures</b>   |               |                      |                |                  |                     |       |
| Insertion of catheter         | 50.0          | 0.36 (0.48)          | 0 [0-1]        | 17.8 (24)        | 0 [0-50]            | 0.3%  |
| Replacement of catheter       | 50.0          | 0.13 (0.38)          | 0 [0-0]        | 6.5 (19)         | 0 [0-0]             | 0.1%  |
| Percutaneous nephrostomy      | 717.6         | 0.05 (0.26)          | 0 [0-0]        | 37.9 (183.8)     | 0 [0-0]             | 0.7%  |
| Insertion of JJ-stent         | 907.0         | 0.05 (0.21)          | 0 [0-0]        | 40.8 (188.2)     | 0 [0-0]             | 0.7%  |
| Abscess drainage              | 557.6         | 0.01 (0.12)          | 0 [0-0]        | 6.9 (69.2)       | 0 [0-0]             | 0.1%  |
| Nephrectomy                   | 3,174.0       | 0.01 (0.08)          | 0 [0-0]        | 19.7 (249.6)     | 0 [0-0]             | 0.3%  |
| Mechanical ventilation (days) | 350.0         | 0.12 (0.99)          | 0 [0-0]        | 41.8 (346.4)     | 0 [0-0]             | 0.7%  |
| Renal replacement (days)      | 254.7         | 0.16 (1.53)          | 0 [0-0]        | 41.9 (389.8)     | 0 [0-0]             | 0.7%  |

|                                                                                                                               |       |               |           |                      |                            |              |
|-------------------------------------------------------------------------------------------------------------------------------|-------|---------------|-----------|----------------------|----------------------------|--------------|
|                                                                                                                               |       |               |           | 213.4 (764.8)        | 0 [0-50]                   | 3.7%         |
| <b>Antibiotic therapy</b>                                                                                                     |       |               |           |                      |                            |              |
| Before hospitalisation (days)                                                                                                 | 1.9   | 1.95 (5.84)   | 0 [0-0]   | 2.6 (20.6)           | 0 [0-0]                    | 0.0%         |
| During hospitalisation (days)                                                                                                 | 12.3  | 12.25 (61.37) | 7 [4-11]  | 197.8 (474.8)        | 19 [7-149]                 | 3.5%         |
| At discharge (days)                                                                                                           | 5.9   | 6 (13.61)     | 4.5 [0-8] | 24.1 (117.5)         | 2 [0-10]                   | 0.4%         |
|                                                                                                                               |       | 1.08 (4.53)   | 0 [0-0]   | 224.6 (490.3)        | 32 [14-199]                | 3.9%         |
| <b>After discharge</b>                                                                                                        |       |               |           |                      |                            |              |
| Readmission (days)                                                                                                            | 477.4 | 1.08 (4.53)   | 0 [0-0]   | 515.2 (2163.4)       | 0 [0-0]                    | 9.0%         |
| Outpatients (visits)                                                                                                          | 122.3 | 0.81 (1.62)   | 0 [0-1]   | 99.2 (197.8)         | 0 [0-122]                  | 1.7%         |
|                                                                                                                               |       |               |           | 614.4 (2197.5)       | 0 [0-245]                  | 10.8%        |
| <b>Total (first hospital admission only)</b>                                                                                  |       |               |           | <b>5,064 (4,847)</b> | <b>3,627 [2,531-5,985]</b> | <b>88.8%</b> |
| <b>Total (first hospital admission + antibiotic treatment before &amp; after discharge)</b>                                   |       |               |           | <b>5,091 (4,844)</b> | <b>3,651 [2,542-6,004]</b> | <b>89.2%</b> |
| <b>Total (hospital admission + antibiotic treatment before &amp; after discharge + readmissions &amp; outpatients visits)</b> |       |               |           | <b>5,705 (5,438)</b> | <b>3,919 [2,664-6,655]</b> | <b>100%</b>  |

\*Unit costs estimated from the three Spanish sites

The mean (median) costs per case were: *i*) including costs incurred during the first hospital admission: 5,064€ (3,627€); *ii*) *i*) plus antibiotic therapy before and after discharge: 5,091€ (3,651€); and *iii*) *ii*) plus outpatient visits and hospital readmissions within 60 days of discharge: 5,705€ (3,919€).

The cost per case was largely driven by the cost due to the length of stay in hospital, which accounted for nearly 80% of the total cost. This was followed by the contribution of the cost of readmissions and outpatient visits after discharge (11%), treatment procedures (4%), antibiotic therapy (4%) and diagnostic tests (3%).

There was variation in the mean cost per cUTI case by country, with a largest mean (median) value of 7,740€ (5,962€) in Turkey and a lowest value of 4,028€ (3,159€) in Israel (Table 3). Note that variations in total costs shown in this table are only due to variations in the management of patients with cUTI, including LOS, as unit costs of healthcare services are held constant across all countries. Table 3 also shows variations by cost components between countries. This suggests that differences in LOS are the main reason of the observed differences in total costs between countries; the mean stay in hospital in a general ward varies from 6 days in Israel to 14 days in Italy.

**Table 3. Mean cost per case by cost component – by country**



|          | N   |                | Total cost<br>(€)   | LOS<br>(€) | DIAG<br>(€) | TREAT<br>(€) | ATB<br>(€) | DISCH<br>(€) | LOS<br>ward<br>(days) | LOS<br>ICU<br>(days) |
|----------|-----|----------------|---------------------|------------|-------------|--------------|------------|--------------|-----------------------|----------------------|
| Bulgaria | 31  | Mean (SD)      | 4,907 (4,130)       | 3,943      | 111         | 298          | 355        | 200          | 8.26                  | 0.00                 |
|          |     | Median [Q1-Q3] | 3,660 [3,187-5,258] | 2,865      | 84          | 0            | 25         | 245          | 6.00                  | 0.00                 |
| Greece   | 65  | Mean (SD)      | 7,039 (5,786)       | 5,670      | 221         | 251          | 586        | 311          | 11.88                 | 0.00                 |
|          |     | Median [Q1-Q3] | 5,581 [3,176-8,934] | 4,774      | 213         | 50           | 70         | 122          | 10.00                 | 0.00                 |
| Hungary  | 49  | Mean (SD)      | 5,656 (5,591)       | 4,044      | 170         | 519          | 35         | 888          | 8.47                  | 0.00                 |
|          |     | Median [Q1-Q3] | 3,765 [2,606-5,905] | 2,865      | 137         | 0            | 19         | 122          | 6.00                  | 0.00                 |
| Israel   | 170 | Mean (SD)      | 4,028 (2,843)       | 3,061      | 133         | 60           | 132        | 641          | 6.41                  | 0.00                 |
|          |     | Median [Q1-Q3] | 3,159 [2,254-4,666] | 2,387      | 110         | 50           | 16         | 0            | 5.00                  | 0.00                 |
| Italy    | 36  | Mean (SD)      | 7,221 (8,271)       | 6,525      | 173         | 38           | 431        | 54           | 13.67                 | 0.00                 |
|          |     | Median [Q1-Q3] | 5,052 [3,670-7,735] | 4,536      | 145         | 0            | 268        | 0            | 9.50                  | 0.00                 |
| Romania  | 107 | Mean (SD)      | 5,024 (3,636)       | 4,493      | 107         | 10           | 125        | 288          | 9.41                  | 0.00                 |
|          |     | Median [Q1-Q3] | 4,314 [3,096-5,849] | 3,819      | 97          | 0            | 37         | 0            | 8.00                  | 0.00                 |
| Spain    | 126 | Mean (SD)      | 6,674 (6,200)       | 4,706      | 193         | 342          | 153        | 1,281        | 9.86                  | 0.00                 |
|          |     | Median [Q1-Q3] | 3,992 [2,705-8,696] | 3,103      | 141         | 0            | 45         | 122          | 6.50                  | 0.00                 |
| Turkey   | 60  | Mean (SD)      | 7,740 (8,006)       | 6,359      | 105         | 512          | 387        | 376          | 11.43                 | 0.57                 |
|          |     | Median [Q1-Q3] | 5,962 [3,375-9,061] | 4,774      | 106         | 50           | 101        | 0            | 9.00                  | 0.00                 |

\*Holding unit costs constant. LOS = Length of stay; DIAG = Diagnostic test; TREAT = Treatment procedures; ATB = Antibiotic therapy; DISCH = After discharge (readmission and outpatient visits); ICU = Intensive Care Unit

## Factors associated with cUTI-related health care costs

The statistically significant drivers of cUTI-related healthcare costs were (Table 1): type of admission (with urgent admissions exhibiting a higher cost than elective admissions); source of infection (with catheterisation associated to higher costs compared with other sources); the infection severity (septic shock and severe sepsis showing a larger cost); the Charlson comorbidity index (with larger values associated to a higher cost); MDR profile (episodes presenting MDR showing a higher cost; only significant at 10% significance level); and country (with most countries exhibiting a significant lower cost than Turkey).

## DISCUSSION

In this study we have measured the cost per episode of patients hospitalised due to cUTI in eight countries with high prevalence of MDR, and explored the factors that explained variations in cUTI-related healthcare costs. The mean cost per hospitalised

1  
2  
3 cUTI case in our data was estimated as 5,700€, corresponding to the costs of a  
4 hospital stay of 9 days on average and including the costs of specific diagnostic and  
5 treatment procedures, as well as antibiotic therapy, readmissions due to cUTI  
6 reoccurrence and outpatient visits after discharge. As expected, the largest cost  
7 component was length of hospital stay, but it is also worth noting that the cost of  
8 antibiotic treatment exceeded that incurred to perform diagnostics tests and it was also  
9 larger than the costs due to any other treatment received by these patients. The cost  
10 per case varied across countries, mainly due to differences in LOS in hospital among  
11 patients with cUTI. These differences in LOS do not appear to be related to the models  
12 of health care in each participating country – the countries with longest LOS, Turkey,  
13 Italy and Greece, have different health care systems, i.e. social insurance system,  
14 national health system and mixed system, respectively. Several factors might explain  
15 these cross-country variations, including financial incentives inherent in hospital  
16 payments methods, availability of beds, and the expansion of early discharge  
17 programmes that allow patients to return to their homes to receive follow-up care [25].  
18  
19  
20  
21  
22  
23  
24  
25  
26  
27  
28  
29  
30  
31

32  
33 Over and above differences across countries, our analysis also identifies a series of  
34 factors associated with higher cUTI-related healthcare costs. Urgent admissions, for  
35 infections due to an indwelling urinary catheterisation, resulting in septic shock or  
36 severe sepsis, in patients with a higher comorbidity index and presenting MDR were  
37 related to a higher cost. The presence of catheter on admission and the Charlson  
38 comorbidity index have also been found in the literature to increase costs of adult  
39 patients hospitalised with UTI, together with time to appropriate therapy [13]. Another  
40 study found males, patients with chronic renal failure, ESBL production and outpatient  
41 parenteral antibiotic therapy to be associated with higher costs in patients with UTI  
42 admitted to hospital [15].  
43  
44  
45  
46  
47  
48  
49  
50  
51  
52

53  
54 Our cost estimates are in line with previous studies that have focused on similar patient  
55 groups. Esteve-Palau et al. 2015 [15] estimated a mean cost per patient hospitalised  
56  
57

1  
2  
3 with symptomatic UTI caused by ESBL-producing *E. coli* of 4,980€ in one hospital in  
4 Spain, excluding readmissions. The cost was significantly lower, 2,612€, among  
5 patients with UTI due to non ESBL-producing *E. coli*. Cardwell et al. 2016 [13] analysed  
6 data on adults patients with a discharged diagnosis code for UTI in one hospital in the  
7 USA and found a mean hospitalisation cost of \$7,586. The costs of nosocomial UTI  
8 infections and UTI infections seen in primary care have been shown to be lower. For  
9 instance, Saint, 2000 estimated the incremental cost of nosocomial UTIs of \$676 and  
10 catheter-related bacteremia of \$2,836 per case [12]. Tambyah et al., 2002 reported that  
11 the mean incremental hospitalisation cost attributable to nosocomial catheter-  
12 associated UTI was \$589 [11]. On the other hand, studies that focused on UTI  
13 infections treated in primary care have reported a mean cost between 70€ [9] and 236€  
14 [10] per episode.

15  
16  
17  
18  
19  
20  
21  
22  
23  
24  
25  
26  
27 This is the first study to examine costs of hospitalised patients due to cUTI from a  
28 multinational point of view. Moreover, it is focused on countries with a high prevalence  
29 of MDR bacteria where cUTI impose a significant burden. In addition, the study  
30 estimated the mean cost per case from a bottom-up perspective, which provided a high  
31 level of granularity and the basis for the assessment of sources of variation and drivers  
32 of healthcare costs. However, the study also has a number of limitations. The design of  
33 the study did not include a control group to assess the extra length of stay and excess  
34 costs of patients who are admitted to hospital due to a different condition and develop  
35 UTI during their hospitalisation. Therefore, we focused in this paper on the analysis of  
36 patients who are admitted because of a cUTI. This is to avoid the overestimation that  
37 would result among cases admitted for other reasons for whom we cannot isolate the  
38 incremental costs that are due to cUTI only. A second limitation of the analysis is that,  
39 as discussed in the Methods section, country-specific unit cost data was not  
40 appropriate for most countries and therefore we applied the same set of unit costs, as  
41 estimated in one country, Spain, to the rest of the countries. While this approach  
42  
43  
44  
45  
46  
47  
48  
49  
50  
51  
52  
53  
54  
55  
56  
57  
58  
59  
60

1  
2  
3 allowed us to explore variations in healthcare costs that are due to differences in the  
4 management of cUTI patients across countries rather than due to differences in the unit  
5 costs of services, it limits the validity of the country-specific estimates. To further  
6 explore the heterogeneity of country-specific estimates we planned to use the tool  
7 developed by WHO-CHOICE health service delivery costs [22], which provides  
8 information on the unit costs of bed-days and outpatient visits across 191 countries.  
9  
10 The information from this dataset indicates that variations in cost estimates across  
11 countries would be enhanced if country-specific unit costs were used. The countries  
12 with the highest unit costs according to this tool, i.e. Spain, Italy and Greece, are  
13 among the countries with higher episode costs based on healthcare utilization in our  
14 analysis; while the country with the lowest unit cost, Bulgaria, has an estimated  
15 episode cost among the lowest in this study. Unfortunately, unit costs values from this  
16 tool are only available for inpatient and outpatient visits, and for 2007-08, and therefore  
17 they could not be used to construct country-specific estimates. In addition, we  
18 acknowledge that the theoretical proper unit cost for a resource is its opportunity cost  
19 (the value of the foregone benefits because the resources are not available for their  
20 next best alternative use). We take, as most previous studies, a pragmatic approach of  
21 using market prices and accounting costs. However, it is worth noting that, especially  
22 for inpatient day cost, these values might overestimate their opportunity costs. This is  
23 because most hospital costs are fixed and cannot be recouped even if the admission is  
24 avoided [26]. We also acknowledge that the number of observations included in the  
25 study for some countries is low, ranging from 31 to 170, which might restrict the  
26 generalisability of country-specific findings. The explanatory power of our models was  
27 also found to be low, which might suggest that there are other factors not captured by  
28 the observed variables included in our models that explain variation in health-care  
29 costs, such as hospital policy on LOS. Finally, the perspective of the analysis was that  
30 of the hospital provider, however if a societal perspective was considered wider costs  
31 related to cUTI should had been taken into account such as patients' costs and  
32  
33  
34  
35  
36  
37  
38  
39  
40  
41  
42  
43  
44  
45  
46  
47  
48  
49  
50  
51  
52  
53  
54  
55  
56  
57  
58  
59  
60

1  
2  
3 productivity losses due to illness, as well as cost incurred by primary care settings;  
4  
5 including these costs would increase the costs of cUTI.  
6

7  
8 In conclusion, this study showed the costs of patients hospitalised due to cUTI are  
9  
10 substantial, but identified wide differences between countries, especially due to  
11  
12 differences in length of stay in the hospital. These findings suggest that a better  
13  
14 knowledge of the reasons for longer length of stays in some countries could facilitate a  
15  
16 better standardised quality of care for patients with cUTI and to allow a more efficient  
17  
18 allocation of healthcare resources. The factors associated with higher cUTI-related  
19  
20 healthcare costs identified by this study also shed light onto some implications for  
21  
22 policy and planning. Prompting preventive measures to minimise cost of hospitalisation  
23  
24 might be aimed at increasing the population's knowledge of symptoms and signs of  
25  
26 infection, in order to encourage patients to attend primary care facilities earlier,  
27  
28 especially those with comorbidities or indwelling urinary catheters, and thus to avoid  
29  
30 the development of severe forms of illness after the onset of symptoms and avoid the  
31  
32 need for urgent admissions.  
33  
34  
35  
36  
37  
38  
39  
40

### 41 **Acknowledgments**

42  
43 We thank the RESCUING Study Group and Study Sites principal investigators: Dora  
44  
45 Tancheva, Rossitza Vatcheva-Dobrevska, Sotirios Tsiodras, Emmanuel Roilides,  
46  
47 Istvan Várkonyi, Judit Bodnár, Aniko Farkas, Mical Paul, Yehuda Carmeli, Emanuele  
48  
49 Durante Mangoni, Cristina Mussini, Nicola Petrosillo, Andrei Vata, Adriana Hristea,  
50  
51 Julia Origüen, Jesus Rodriguez-Baño, Arzu Yetkin, and Nese Saltoglu.  
52  
53

### 54 **Competing interests statement:**

55  
56  
57  
58  
59  
60

1  
2  
3 Within the IMI project, AiCuris provided support for the institutions of the following  
4  
5 Researchers: LVT, MP, ES, JMV, MS, SG, JG, NC, LH, NER, JC, AM, TB, LL, and  
6  
7 SM. IW, CV, CV, and IA are employees of AiCuris Anti-infective Cures GmbH, an  
8  
9 EFPIA (European Federation of Pharmaceutical Industries and Association) member  
10  
11 in the IMI JU. Costs related to the research contribution by IW, CV, CV and IA are  
12  
13 borne by AiCuris Anti-infective Cures GmbH and considered in-kind contribution under  
14  
15 the IMI JU scheme.

### 16 17 18 **Funding statement**

19  
20 This research project receives support from the Innovative Medicines Initiative Joint  
21  
22 Undertaking under grant agreement n° 115523 | 115620 | 115737 resources of which  
23  
24 are composed of financial contribution from the European Union Seventh Framework  
25  
26 Programme (FP7/2007-2013) and EFPIA companies in kind contribution. The research  
27  
28 leading to these results was conducted as part of the COMBACTE-MAGNET  
29  
30 consortium. For further information please refer to [www.COMBACTE.com](http://www.COMBACTE.com).

### 31 32 33 **Authors' contribution**

34  
35 Conceptualisation: LVT, MP, ES, IW, JMV, MS, SG, JG, CV, NC, LvdH, NER, JC, CV,  
36  
37 AM, TB, LL, IA, SM; Acquisition of data: LVT, MP, ES, IW, JMV, MS, SG, JG, CV, NC,  
38  
39 LvdH, NER, JC, CV, AM, TB, LL, IA, SM; Analysis of data: LVT, MP, ES, LL, SM;  
40  
41 Writing—original draft preparation: LVT, MP, ES, LL, SM; Writing—review and editing:  
42  
43 LVT, MP, ES, IW, JMV, MS, SG, JG, CV, NC, LvdH, NER, JC, CV, AM, TB, LL, IA, SM;  
44  
45 Agree with manuscript results and conclusions: LVT, MP, ES, IW, JMV, MS, SG, JG,  
46  
47 CV, NC, LvdH, NER, JC, CV, AM, TB, LL, IA, SM

### 48 49 50 **Data sharing statement**

51  
52 No additional data available

### 53 54 55 **References**

1. Lichtenberger P, Hooton TM. Complicated urinary tract infections. *Curr Infect Dis Rep* 2008;**10**(6):499-504.
2. Nicolle LE. A practical guide to the management of complicated urinary tract infection. *Drugs* 1997;**53**:583-92.
3. Levison ME, Kaye D. Treatment of complicated urinary tract infections with an emphasis on drug-resistant gram-negative uropathogens. *Curr Infect Dis Rep* 2013;**15**:109-15.
4. Foxman B. Epidemiology of urinary tract infections: incidence, morbidity, and economic costs. *Am J Med* 2002; **113**(Suppl 1A):5S-13S.
5. European Centre for Disease prevention and Control. Point prevalence survey of healthcare-associated infections and antimicrobial use in European acute care hospitals. Stockholm: ECDC; 2013.  
<http://ecdc.europa.eu/en/publications/Publications/healthcare-associated-infections-antimicrobial-use-PPS.pdf>.
6. Cassini A, Plachouras D, Eckmanns T, Abu Sin M, Blank HP, Ducombe T, Haller S, Harder T, Klingeberg A, Sixtensson M, Velasco E, Weiß B, Kramarz P, Monnet DL, Kretzschmar ME, Suetens C. Burden of Six Healthcare-Associated Infections on European Population Health: Estimating Incidence-Based Disability-Adjusted Life Years through a Population Prevalence-Based Modelling Study. *PLoS Med* 2016;**18**;13(10):e1002150
7. Rosenberg M. Pharmacoeconomics of treating uncomplicated urinary tract infections. *Int J Antimicrob Agents* 1999;**11**(3-4):247-51
8. Foxman B, Barlow R, D'Arcy H, Gillespie B, Sobel JD. Urinary tract infection: self-reported incidence and associated costs. *Ann Epidemiol* 2000;**10**(8):509-15.
9. François M, Hanslik T, Dervaux B, Le Strat Y, Souty C, Vaux S, Maugat S, Rondet C, Sarazin M, Heym B, Coignard B, Rossignol L. The economic burden

- 1  
2  
3 of urinary tract infections in women visiting general practices in France: a cross-  
4 sectional survey. *BMC Health Serv Res* 2016;**16**:365  
5  
6  
7 10. Ciani O, Grassi D, Tarricone R. An Economic Perspective on Urinary Tract  
8 Infection: The “Costs of Resignation”. *Clin Drug Investig* 2013;**33**:255–261  
9  
10  
11 11. Tambyah PA, Knasinski V, Maki DG. The direct costs of nosocomial catheter-  
12 associated urinary tract infection in the era of managed care. *Infect Control*  
13 *Hosp Epidemiol* 2002;**23**(1):27-31.  
14  
15  
16 12. Saint S. Clinical and economic consequences of nosocomial catheter-related  
17 bacteriuria. *Am J Infect Control* 2000;**28**(1):68-75.  
18  
19  
20 13. Cardwell SM, Crandon JL, Nicolau DP, McClure MH, Nailor MD. Epidemiology  
21 and economics of adult patients hospitalized with urinary tract infections. *Hosp*  
22 *Pract* 2016;**44**(1):33-40.  
23  
24  
25 14. MacVane SH, Tuttle LO, Nicolau DP. Impact of extended-spectrum  $\beta$ -  
26 lactamase-producing organisms on clinical and economic outcomes in patients  
27 with urinary tract infection. *J Hosp Med* 2014;**9**(4):232-8.  
28  
29  
30 15. Esteve-Palau E, Solande G, Sánchez F, Sorlí L, Montero M, Güerri R, et al.  
31 Clinical and economic impact of urinary tract infections caused by ESBL-  
32 producing Escherichia coli requiring hospitalization: A matched cohort study. *J*  
33 *Infect* 2015; **71**:667-74.  
34  
35  
36 16. Shaw E, Addy I, Stoddart M, Vank C, Grier S, Wiegand I, Leibovici L, Eliakim-  
37 Raz N, Vallejo-Torres L, Morris S, MacGowan A, Carratalà J, Pujol M;  
38 COMBACTE-MAGNET Consortium. Retrospective observational study to  
39 assess the clinical management and outcomes of hospitalised patients with  
40 complicated urinary tract infection in countries with high prevalence of multidrug  
41 resistant Gram-negative bacteria (RESCUING). *BMJ Open*  
42 2016;**29**;6(7):e011500.  
43  
44  
45  
46  
47  
48  
49  
50  
51  
52  
53  
54 17. U.S. Department of Health and Human Services Food and Drug Administration.  
55 Complicated Urinary Tract Infections: Developing Drugs for Treatment  
56  
57  
58  
59  
60



- 1  
2  
3 Guidance for Industry. 2015. Available at:  
4  
5 <https://www.fda.gov/downloads/Drugs/.../Guidances/ucm070981.pdf>  
6  
7 18. Roberts RR, Scott RD 2nd, Hota B, Kampe LM, Abbasi F, Schabowski S,  
8 Ahmad I, Ciavarella GG, Cordell R, Solomon SL, Hagtvedt R, Weinstein RA.  
9 Costs attributable to healthcare-acquired infection in hospitalized adults and a  
10 comparison of economic methods. *Med Care* 2010; **48**(11):1026-35.  
11  
12 19. Charlson ME, Pompei P, Ales KL, et al. A new method of classifying prognostic  
13 comorbidity in longitudinal studies: development and validation. *J Chronic Dis*  
14 1987;**40**:373–83.  
15  
16 20. Turner RM, Wu B, Lawrence K, et al. Assessment of outpatient and inpatient  
17 antibiotic treatment patterns and health care costs of patients with complicated  
18 urinary tract infections. *Clin Ther* 2015;**37**:2037–47.  
19  
20 21. Bader MS, Hawboldt J, Brooks A. Management of complicated urinary tract  
21 infections in the era of antimicrobial resistance. *Postgrad Med* 2010;**122**:7–15.  
22  
23 22. World Health Organization. WHO-Choice unit cost estimates for service  
24 delivery. World Health Organization 2011. Available:  
25 [http://www.who.int/choice/country/WHO-](http://www.who.int/choice/country/WHO-CHOICEunit_cost_estimates_2007_2008.xls)  
26 [CHOICEunit\\_cost\\_estimates\\_2007\\_2008.xls](http://www.who.int/choice/country/WHO-CHOICEunit_cost_estimates_2007_2008.xls).  
27  
28 23. Ahmed NH, Hussain T, Biswal I. Comparison of etiological agents and  
29 resistance patterns of the pathogens causing community acquired and hospital  
30 acquired urinary tract infections. *J Glob Infect Dis*. 2014 **6**(3):135-6.  
31  
32 24. Magiorakos AP, Srinivasan A, Carey RB, Carmeli Y, Falagas ME, Giske CG et  
33 al. Multidrug-resistant, extensively drug-resistant and pandrug-resistant  
34 bacteria: an international expert proposal for interim standard definitions for  
35 acquired resistance. *Clin Microbiol Infec*. 2012; **18**:268-81  
36  
37 25. OECD. Health at a Glance 2017: OECD Indicators, OECD Publishing, Paris.  
38 2017. Available at: [http://dx.doi.org/10.1787/health\\_glance-2017-en](http://dx.doi.org/10.1787/health_glance-2017-en)  
39  
40  
41  
42  
43  
44  
45  
46  
47  
48  
49  
50  
51  
52  
53  
54  
55  
56  
57  
58  
59  
60

- 1  
2  
3 26. Stewardson AJ, Harbarth S, Graves N; TIMBER Study. Group. Valuation of  
4 Hospital Bed-Days Released by Infection Control Programs: A Comparison of  
5 Methods. *Infect Control Hosp Epidemiol.* 2014; **35**(10):1294-7  
6  
7  
8  
9  
10  
11  
12  
13  
14  
15  
16  
17  
18  
19  
20  
21  
22  
23  
24  
25  
26  
27  
28  
29  
30  
31  
32  
33  
34  
35  
36  
37  
38  
39  
40  
41  
42  
43  
44  
45  
46  
47  
48  
49  
50  
51  
52  
53  
54  
55  
56  
57  
58  
59  
60

For peer review only

## S1. Unit costs questionnaire

### RESCUING ECONOMIC FORM

In the questionnaire below we ask for the unit costs of health care resources and services for the diagnosis, treatment and supportive care related to the management of cUTI. This information will allow us to estimate the cost per case as well as the total national burden of cUTI in your country. The questionnaire allows you to save the information already entered and to continue later. By using the same URL/web address, you will be able to continue where you left off.

What is the monetary unit you report in this form?

Euro

Other: \_\_\_\_\_

### Hospital stays and visits

Please provide the unit cost per hospital stay day and outpatient visit in your hospital. Ideally we request the cost specifically among patients with cUTI (for example, the average cost among patients with discharge codes related to cUTI, e.g. ICD-9 CM Codes 590.1, 590.10, 590.11, 590.2, 590.8, 590.80, 590.9, 595.0, 595.89, 595.9, 599.0). If you are unable to provide the unit cost specifically for cUTI patients, please provide the average unit cost for the speciality that cUTI patients are treated in in your hospital (e.g., one of urology, gynaecology, general medicine). If costs are not available by speciality then please provide the average unit costs data across all patients in your hospital. Please specify the details of the data you are providing, such as the patients' ICD codes you used to compute the unit costs or whether the values are related to all types of patients.

Please fill in the table with the costs at your hospital even if you do not have data specifically for cUTI patients; it will be very useful for us, provided you explain in the Details section what these costs refer to.

|                                        | Cost per day/visit | Details |
|----------------------------------------|--------------------|---------|
| Hospital stay per diem in general ward |                    |         |
| Hospital stay per diem in ICU          |                    |         |
| Outpatient hospital visit              |                    |         |

### Procedures

Please provide the unit costs of the following procedures in your hospital. Next to each procedure we indicate the ICD9-CM procedures codes to make it simpler for you to identify the procedures we are interested in. Please specify the details of the data you are providing, such as the ICD9 codes or the specific name of the procedure you are providing data for.

If you have more than one cost for each procedure please provide the mean, ideally based on the proportion of patients receiving each procedure.

| Procedure [ICD9-CM code]         | Cost per procedure | Details |
|----------------------------------|--------------------|---------|
| Urine culture [9132]             |                    |         |
| Dipstick analysis [9139]         |                    |         |
| Urinary sediment analysis [9133] |                    |         |
| Gram stain test [9131]           |                    |         |
| Blood culture [9052]             |                    |         |

|                                                    |              |         |
|----------------------------------------------------|--------------|---------|
| Abdominal Ultrasonography [8876]                   |              |         |
| CT Scan [9218, 9219]                               |              |         |
| Pyelography [8773, 8774, 8775]                     |              |         |
| MRI scan [8895]                                    |              |         |
| Insertion of an indwelling bladder-catheter [5794] |              |         |
| Percutaneous nephrostomy [5503, 5504]              |              |         |
| Insertion of JJ-stent [598]                        |              |         |
| Abscess drainage [472, 5491]                       |              |         |
| Nephrectomy [5501, 5502]                           |              |         |
|                                                    | Cost per day | Details |
| Invasive mechanical ventilation [9670, 9671, 9672] |              |         |
| Dialysis/Renal replacement therapy [3995, 5498]    |              |         |

### Antibiotic therapy

Please provide for the antibiotic therapies listed below the unit cost per dose and specify the relevant dose. Please respond only for the antibiotics used in your hospital, and if there are other antibiotics used frequently in your hospital which are not included in this list, please add them in the space provided.

| Antibiotic (intravenous (IV)/oral administration) | Dose    | Cost per dose |
|---------------------------------------------------|---------|---------------|
| AMIKACIN (IV)                                     | 500 mg  |               |
| AMOXICILLIN (oral)                                | 500 mg  |               |
| AMOXICILLIN (oral)                                | 750 mg  |               |
| AMOXICILLIN (ORAL)                                | 1000 MG |               |

|    |                                    |             |  |
|----|------------------------------------|-------------|--|
| 1  |                                    |             |  |
| 2  |                                    |             |  |
| 3  | AMOXICILLIN/CLAVULANIC ACID (IV)   | 1000/200 mg |  |
| 4  |                                    |             |  |
| 5  | AMOXICILLIN/CLAVULANIC ACID (oral) | 500/125 mg  |  |
| 6  |                                    |             |  |
| 7  | AMOXICILLIN/CLAVULANIC ACID (oral) | 875/125 mg  |  |
| 8  |                                    |             |  |
| 9  | AMPICILLIN (IV)                    | 1000 mg     |  |
| 10 |                                    |             |  |
| 11 | CEFIXIME (oral)                    | 400 mg      |  |
| 12 |                                    |             |  |
| 13 | CEFIXIME (oral)                    | 200 mg      |  |
| 14 |                                    |             |  |
| 15 | CEFTAZIDIME (IV)                   | 2000 mg     |  |
| 16 |                                    |             |  |
| 17 | CEFTRIAXONE (IV)                   | 1000 mg     |  |
| 18 |                                    |             |  |
| 19 | CEFUROXIME (IV)                    | 750 mg      |  |
| 20 |                                    |             |  |
| 21 | CEFUROXIME (oral)                  | 500 mg      |  |
| 22 |                                    |             |  |
| 23 | CEFUROXIME (oral)                  | 250 mg      |  |
| 24 |                                    |             |  |
| 25 | CIPROFLOXACIN (oral)               | 500 mg      |  |
| 26 |                                    |             |  |
| 27 | CIPROFLOXACIN (oral)               | 750 mg      |  |
| 28 |                                    |             |  |
| 29 | CIPROFLOXACIN (IV)                 | 200 mg      |  |
| 30 |                                    |             |  |
| 31 | COLISTIN (IV)                      | 1 MUI       |  |
| 32 |                                    |             |  |
| 33 | CO-TRIMOXAZOL (oral)               | 400/80 mg   |  |
| 34 |                                    |             |  |
| 35 | CO-TRIMOXAZOLE (IV)                | 800/160 mg  |  |
| 36 |                                    |             |  |
| 37 | CO-TRIMOXAZOLE (IV)                | 400/80 mg   |  |
| 38 |                                    |             |  |
| 39 | CO-TRIMOXAZOLE (oral)              | 800/160 mg  |  |
| 40 |                                    |             |  |
| 41 | DAPTOMYCIN                         | 500 mg      |  |
| 42 |                                    |             |  |
| 43 | ERTAPENEM (IV)                     | 1000 mg     |  |
| 44 |                                    |             |  |
| 45 | FOSFOMYCIN (IV)                    | 1000 mg     |  |
| 46 |                                    |             |  |
| 47 | FOSFOMYCIN (IV)                    | 4000 mg     |  |
| 48 |                                    |             |  |
| 49 | FOSFOMYCIN (oral)                  | 500 mg      |  |
| 50 |                                    |             |  |
| 51 | FOSFOMYCIN TROMETANOL (oral)       | 3000 mg     |  |
| 52 |                                    |             |  |
| 53 | FOSFOMYCIN TROMETANOL (oral)       | 2000 mg     |  |
| 54 |                                    |             |  |
| 55 | GENTAMICIN                         | 240 mg      |  |
| 56 |                                    |             |  |
| 57 | IMIPENEM-CILASTATIN (IV)           | 500/500 mg  |  |
| 58 |                                    |             |  |
| 59 | LEVOFLOXACIN (IV)                  | 500 mg      |  |
| 60 |                                    |             |  |

|    |                                |             |  |
|----|--------------------------------|-------------|--|
| 1  | LEVOFLOXACIN (oral)            | 500 mg      |  |
| 2  |                                |             |  |
| 3  | LINEZOLID (IV)                 | 600 mg      |  |
| 4  |                                |             |  |
| 5  | LINEZOLID (oral)               | 600 mg      |  |
| 6  |                                |             |  |
| 7  | MEROPENEM (IV)                 | 1000 mg     |  |
| 8  |                                |             |  |
| 9  | METRONIDAZOLE (IV)             | 500 mg      |  |
| 10 |                                |             |  |
| 11 | METRONIDAZOLE (oral)           | 250 mg      |  |
| 12 |                                |             |  |
| 13 | NITROFURANTOIN (oral)          | 100         |  |
| 14 |                                |             |  |
| 15 | PIPERACILLIN + TAZOBACTAM (IV) | 4000/500 mg |  |
| 16 |                                |             |  |
| 17 | PIPERACILLIN + TAZOBACTAM (IV) | 3000/375 mg |  |
| 18 |                                |             |  |
| 19 | TEICoplanin (IV)               | 400 mg      |  |
| 20 |                                |             |  |
| 21 | TRIMETHOPRIM                   | 160 mg      |  |
| 22 |                                |             |  |
| 23 | VANCOMYCIN (IV)                | 500 mg      |  |
| 24 |                                |             |  |
| 25 | Name antibiotic 1              |             |  |
| 26 |                                |             |  |
| 27 | Name antibiotic 2              |             |  |
| 28 |                                |             |  |
| 29 | Name antibiotic 3              |             |  |
| 30 |                                |             |  |
| 31 | Name antibiotic 4              |             |  |
| 32 |                                |             |  |
| 33 | Name antibiotic 5              |             |  |
| 34 |                                |             |  |
| 35 |                                |             |  |
| 36 |                                |             |  |
| 37 |                                |             |  |
| 38 |                                |             |  |
| 39 |                                |             |  |
| 40 |                                |             |  |
| 41 |                                |             |  |
| 42 |                                |             |  |
| 43 |                                |             |  |
| 44 |                                |             |  |
| 45 |                                |             |  |
| 46 |                                |             |  |
| 47 |                                |             |  |
| 48 |                                |             |  |
| 49 |                                |             |  |
| 50 |                                |             |  |
| 51 |                                |             |  |
| 52 |                                |             |  |
| 53 |                                |             |  |
| 54 |                                |             |  |
| 55 |                                |             |  |
| 56 |                                |             |  |
| 57 |                                |             |  |
| 58 |                                |             |  |
| 59 |                                |             |  |
| 60 |                                |             |  |

Thank you for filling in this questionnaire.

## Supplementary material 2

### Factors associated with cUTI-related healthcare costs – statistical details

The analysis of the factors associated with cUTI-related healthcare costs was undertaken using multivariate regression analysis using patient level cost data. The dependent variable was total cost per patient estimated as described above.

To account for skewness of the cost data, generalised linear models with gamma family and log link were used [1]. We also considered using log Normal, Gaussian, inverse Gaussian and negative binomial distributions, but the gamma model gave the best fit in terms of the Akaike Information Criterion. We did not include as explanatory variables any of the variables used to construct the total cost per patient. We also exclude variables with a high collinearity ( $r > 0.6$ ). The variable selection in the reduced model was undertaken using forward and backward inclusion methods. P-values below the 5% level are regarded as statistically significant. Values between 5 and 10% are regarded as weakly significant.

For the quantitative interpretation of the effect of each variable, we computed marginal effects at the mean values of the included covariates. The impact of unobserved heterogeneity due to the hierarchical structure of the data is explored and accounted for by considering country fixed effects models. We also adjust for clustering at the site level by computing robust standard errors, and control for the patient episode number by including this indicator as an explanatory variable in the models.

### References

1. Barber J, Thompson S. Multiple regression of cost data: use of generalised linear models. *J Health Serv Res Policy* 2004;**9**:197-204.
2. Magiorakos AP, Srinivasan A, Carey RB, Carmeli Y, Falagas ME, Giske CG et al. Multidrug-resistant, extensively drug-resistant and pandrug-resistant bacteria:



1  
2  
3 an international expert proposal for interim standard definitions for acquired  
4  
5 resistance. *Clin Microbiol Infec.* 2012; **18**:268-81  
6  
7  
8  
9  
10  
11  
12  
13  
14  
15  
16  
17  
18  
19  
20  
21  
22  
23  
24  
25  
26  
27  
28  
29  
30  
31  
32  
33  
34  
35  
36  
37  
38  
39  
40  
41  
42  
43  
44  
45  
46  
47  
48  
49  
50  
51  
52  
53  
54  
55  
56  
57  
58  
59  
60

For peer review only

**STROBE 2007 (v4) Statement—Checklist of items that should be included in reports of *cohort studies***

| Section/Topic                | Item # | Recommendation                                                                                                                                                                       | Reported on page # |
|------------------------------|--------|--------------------------------------------------------------------------------------------------------------------------------------------------------------------------------------|--------------------|
| Title and abstract           | 1      | (a) Indicate the study's design with a commonly used term in the title or the abstract                                                                                               | 1                  |
|                              |        | (b) Provide in the abstract an informative and balanced summary of what was done and what was found                                                                                  | 1-2                |
| <b>Introduction</b>          |        |                                                                                                                                                                                      |                    |
| Background/rationale         | 2      | Explain the scientific background and rationale for the investigation being reported                                                                                                 | 3                  |
| Objectives                   | 3      | State specific objectives, including any prespecified hypotheses                                                                                                                     | 4                  |
| <b>Methods</b>               |        |                                                                                                                                                                                      |                    |
| Study design                 | 4      | Present key elements of study design early in the paper                                                                                                                              | 4                  |
| Setting                      | 5      | Describe the setting, locations, and relevant dates, including periods of recruitment, exposure, follow-up, and data collection                                                      | 4-5                |
| Participants                 | 6      | (a) Give the eligibility criteria, and the sources and methods of selection of participants. Describe methods of follow-up                                                           | 4-5                |
|                              |        | (b) For matched studies, give matching criteria and number of exposed and unexposed                                                                                                  | NA                 |
| Variables                    | 7      | Clearly define all outcomes, exposures, predictors, potential confounders, and effect modifiers. Give diagnostic criteria, if applicable                                             | 5-6                |
| Data sources/<br>measurement | 8*     | For each variable of interest, give sources of data and details of methods of assessment (measurement). Describe comparability of assessment methods if there is more than one group | 5                  |
| Bias                         | 9      | Describe any efforts to address potential sources of bias                                                                                                                            | 5                  |
| Study size                   | 10     | Explain how the study size was arrived at                                                                                                                                            | 6                  |
| Quantitative variables       | 11     | Explain how quantitative variables were handled in the analyses. If applicable, describe which groupings were chosen and why                                                         | 6-7                |
| Statistical methods          | 12     | (a) Describe all statistical methods, including those used to control for confounding                                                                                                | 8                  |
|                              |        | (b) Describe any methods used to examine subgroups and interactions                                                                                                                  | NA                 |
|                              |        | (c) Explain how missing data were addressed                                                                                                                                          | 9                  |
|                              |        | (d) If applicable, explain how loss to follow-up was addressed                                                                                                                       | NA                 |
|                              |        | (e) Describe any sensitivity analyses                                                                                                                                                | NA                 |
| <b>Results</b>               |        |                                                                                                                                                                                      |                    |

|                          |     |                                                                                                                                                                                                              |           |
|--------------------------|-----|--------------------------------------------------------------------------------------------------------------------------------------------------------------------------------------------------------------|-----------|
| Participants             | 13* | (a) Report numbers of individuals at each stage of study—eg numbers potentially eligible, examined for eligibility, confirmed eligible, included in the study, completing follow-up, and analysed            | 9; 19     |
|                          |     | (b) Give reasons for non-participation at each stage                                                                                                                                                         | 9; 19     |
|                          |     | (c) Consider use of a flow diagram                                                                                                                                                                           | NA        |
| Descriptive data         | 14* | (a) Give characteristics of study participants (eg demographic, clinical, social) and information on exposures and potential confounders                                                                     | 9; 19     |
|                          |     | (b) Indicate number of participants with missing data for each variable of interest                                                                                                                          | 9; 19     |
|                          |     | (c) Summarise follow-up time (eg, average and total amount)                                                                                                                                                  | NA        |
| Outcome data             | 15* | Report numbers of outcome events or summary measures over time                                                                                                                                               | 9-10; 20  |
| Main results             | 16  | (a) Give unadjusted estimates and, if applicable, confounder-adjusted estimates and their precision (eg, 95% confidence interval). Make clear which confounders were adjusted for and why they were included | 10-11; 20 |
|                          |     | (b) Report category boundaries when continuous variables were categorized                                                                                                                                    | 20-21     |
|                          |     | (c) If relevant, consider translating estimates of relative risk into absolute risk for a meaningful time period                                                                                             | NA        |
| Other analyses           | 17  | Report other analyses done—eg analyses of subgroups and interactions, and sensitivity analyses                                                                                                               | NA        |
| <b>Discussion</b>        |     |                                                                                                                                                                                                              |           |
| Key results              | 18  | Summarise key results with reference to study objectives                                                                                                                                                     | 11-12     |
| <b>Limitations</b>       |     |                                                                                                                                                                                                              |           |
| Interpretation           | 20  | Give a cautious overall interpretation of results considering objectives, limitations, multiplicity of analyses, results from similar studies, and other relevant evidence                                   | 11-13     |
| Generalisability         | 21  | Discuss the generalisability (external validity) of the study results                                                                                                                                        | 12-13     |
| <b>Other information</b> |     |                                                                                                                                                                                                              |           |
| Funding                  | 22  | Give the source of funding and the role of the funders for the present study and, if applicable, for the original study on which the present article is based                                                | 14        |

\*Give information separately for cases and controls in case-control studies and, if applicable, for exposed and unexposed groups in cohort and cross-sectional studies.

**Note:** An Explanation and Elaboration article discusses each checklist item and gives methodological background and published examples of transparent reporting. The STROBE checklist is best used in conjunction with this article (freely available on the Web sites of PLoS Medicine at <http://www.plosmedicine.org/>, Annals of Internal Medicine at <http://www.annals.org/>, and Epidemiology at <http://www.epidem.com/>). Information on the STROBE Initiative is available at [www.strobe-statement.org](http://www.strobe-statement.org).
